# Supplementary material for: Racial and Ethnic Bias in the Diagnosis of Alcohol Use Disorder in Veterans
Source: Atypon-hosted journal article supplement (doi:10.1176/appi.ajp.21111097), 2023-05-03
Supplement: appi.ajp.21111097.ds001.pdf [file appi.ajp.21111097.ds001.pdf]

Figure S1. Flow chart of study inclusion.

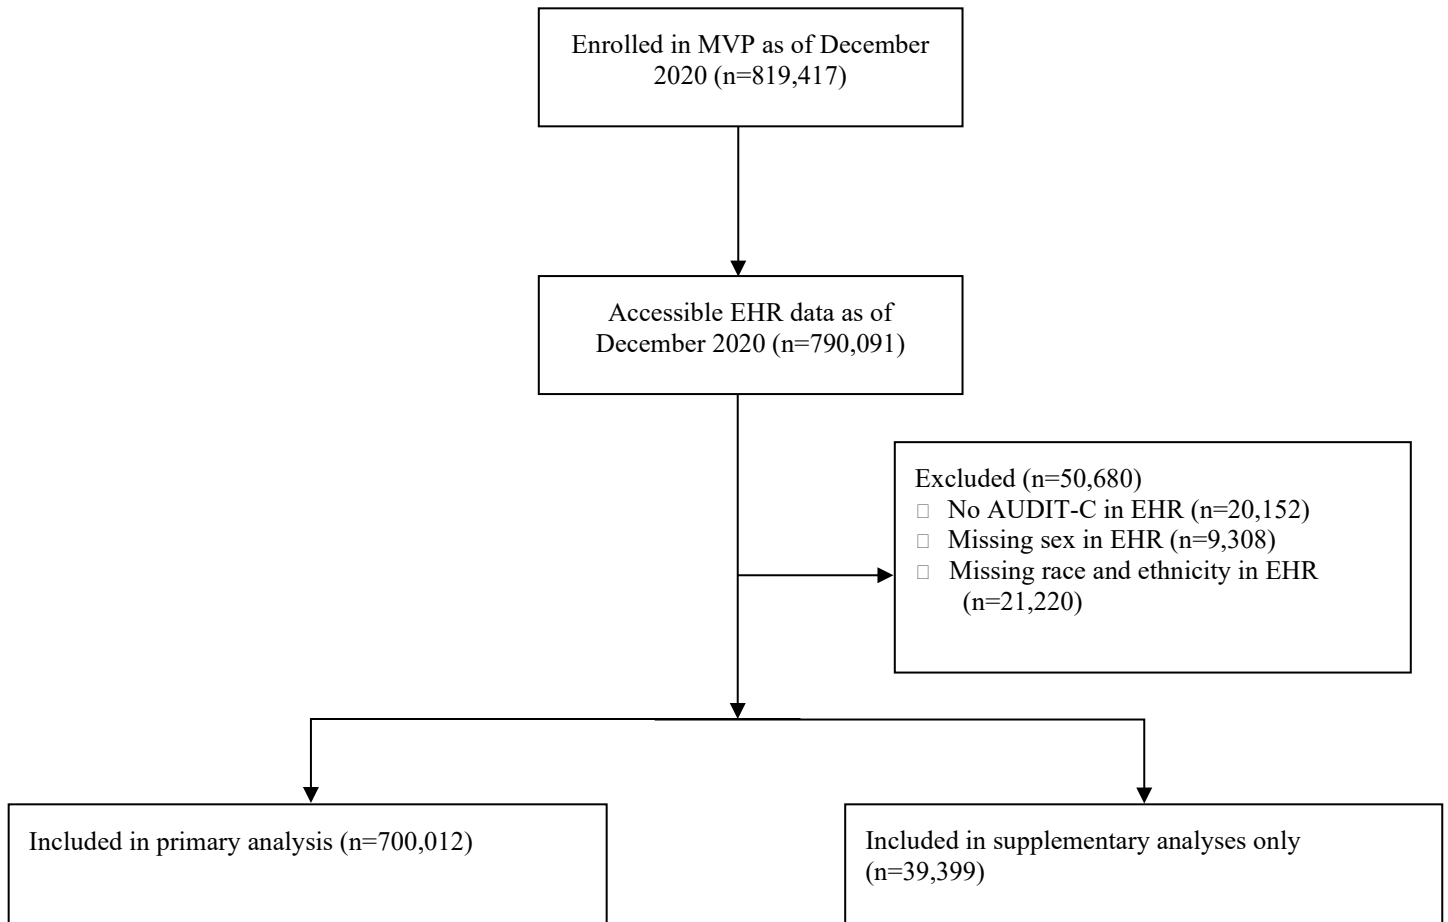

MVP = Million Veteran Program; EHR = electronic health record; AUDIT-C = Alcohol Use Disorders Identification Test – Consumption.

Table S1A. Demographic and clinical characteristics of men excluded in the primary analysis by race and ethnicity (n=34,056).

|                                                                              | American Indian/<br>Alaska Native<br>13.7% (n=4,677) | Asian<br>21.0% (n=7,135) | Native Hawaiian/<br>Pacific Islander<br>9.1% (n=3,102) | Other/Multiple Races<br>56.2% (n=19,142) |
|------------------------------------------------------------------------------|------------------------------------------------------|--------------------------|--------------------------------------------------------|------------------------------------------|
| Age (y) – mean (SD)*                                                         | 60.1 (12.7)                                          | 53.8 (17.0)              | 57.3 (14.7)                                            | 61.4 (12.5)                              |
| <i>Alcohol-Related Characteristics</i>                                       |                                                      |                          |                                                        |                                          |
| Highest AUDIT-C<br>harmful drinking risk<br>level (highest AUDIT-C<br>score) |                                                      |                          |                                                        |                                          |
| No Risk (0)                                                                  | 26.2% (1,223)                                        | 20.7% (1,477)            | 22.2% (689)                                            | 22.5% (4,305)                            |
| Low Risk (1-3)                                                               | 36.8% (1,721)                                        | 49.5% (3,534)            | 40.3% (1,250)                                          | 43.8% (8,381)                            |
| Moderate Risk (4-7)                                                          | 22.5% (1,050)                                        | 21.8% (1,558)            | 23.5% (729)                                            | 23.2% (4,446)                            |
| High Risk (8+)                                                               | 14.6% (683)                                          | 7.9% (566)               | 14.0% (434)                                            | 10.5% (2,010)                            |
| Number of AUDIT-C<br>assessments – mean<br>(SD)                              | 8.9 (4.4)                                            | 7.1 (3.7)                | 8.4 (4.0)                                              | 9.1 (4.3)                                |
| AUD                                                                          | 28.7% (1,343)                                        | 11.8% (840)              | 21.9% (678)                                            | 21.0% (4,022)                            |
| Cirrhosis**                                                                  | 2.5% (117)                                           | 0.3% (19)                | 1.6% (49)                                              | 1.5% (283)                               |
| Neuropathy**                                                                 | 0.2% (10)                                            | 0.0% (0)                 | 0.1% (4)                                               | 0.3% (56)                                |
| Cardiomyopathy**                                                             | 0.2% (10)                                            | <0.1% (1)                | 0.1% (2)                                               | 0.2% (31)                                |
| Gastritis**                                                                  | 0.3% (16)                                            | 0.1% (5)                 | 0.1% (3)                                               | 0.2% (43)                                |
| Fatty liver disease**                                                        | 0.6% (30)                                            | 0.3% (19)                | 0.8% (25)                                              | 0.5% (92)                                |
| Hepatitis**                                                                  | 0.9% (42)                                            | 0.1% (8)                 | 0.6% (17)                                              | 0.6% (113)                               |
| Liver damage**                                                               | 0.5% (24)                                            | 0.1% (9)                 | 0.2% (7)                                               | 0.3% (62)                                |
| <i>Other Clinical ICD-9/10 Diagnoses</i>                                     |                                                      |                          |                                                        |                                          |
| Drug abuse/dependence                                                        | 19.2% (897)                                          | 6.5% (465)               | 14.5% (451)                                            | 15.4% (2,948)                            |
| AUD + drug<br>abuse/dependence                                               | 14.9% (695)                                          | 4.2% (300)               | 10.3% (318)                                            | 10.8% (2,067)                            |
| Mental disorder                                                              | 62.0% (2,900)                                        | 47.1% (3,359)            | 60.0% (1,860)                                          | 56.8% (10,878)                           |
| AUD + mental disorder                                                        | 23.7% (1,110)                                        | 10.0% (706)              | 18.1% (562)                                            | 17.3% (3,307)                            |

SD = standard deviation; AUDIT-C = Alcohol Use Disorders Identification Test – Consumption; AUD = alcohol use disorder.

\*Number of observations with missing age: Asian (n=4), Other/Multiple Races (n=2). \*\* Alcohol-specific diagnosis.

Table S1B. Demographic and clinical characteristics of women excluded in the primary analysis by race and ethnicity (n=5,343).

|                                                                              | American Indian/<br>Alaska Native<br>13.1% (n=702) | Asian<br>17.5% (n=934) | Native Hawaiian/<br>Pacific Islander<br>7.4% (n=394) | Other/Multiple Races<br>62.0% (n=3,313) |
|------------------------------------------------------------------------------|----------------------------------------------------|------------------------|------------------------------------------------------|-----------------------------------------|
| Age (y) – mean (SD)*                                                         | 50.4 (12.8)                                        | 43.1 (12.8)            | 47.1 (12.7)                                          | 51.4 (12.6)                             |
| <i>Alcohol-Related Characteristics</i>                                       |                                                    |                        |                                                      |                                         |
| Highest AUDIT-C<br>harmful drinking risk<br>level (highest AUDIT-C<br>score) |                                                    |                        |                                                      |                                         |
| No Risk (0)                                                                  | 21.7% (152)                                        | 20.6% (192)            | 20.6% (81)                                           | 18.9% (626)                             |
| Low Risk (1, 2)                                                              | 42.9% (301)                                        | 49.7% (464)            | 50.8% (200)                                          | 48.5% (1,607)                           |
| Moderate Risk (3-7)                                                          | 29.8% (209)                                        | 26.5% (247)            | 23.6% (93)                                           | 27.8% (921)                             |
| High Risk (8+)                                                               | 5.7% (40)                                          | 3.3% (31)              | 5.1% (20)                                            | 4.8% (159)                              |
| Number of AUDIT-C<br>assessments – mean<br>(SD)                              | 8.7 (5.2)                                          | 7.1 (3.6)              | 8.4 (4.3)                                            | 9.2 (4.4)                               |
| AUD                                                                          | 17.2% (121)                                        | 8.0% (75)              | 13.5% (53)                                           | 12.4% (409)                             |
| Cirrhosis**                                                                  | 0.4% (3)                                           | 0.0% (0)               | 0.5% (2)                                             | 0.4% (14)                               |
| Neuropathy**                                                                 | 0.1% (1)                                           | 0.0% (0)               | 0.3% (1)                                             | <0.1% (1)                               |
| Cardiomyopathy**                                                             | 0.1% (1)                                           | 0.0% (0)               | 0.0% (0)                                             | 0.0% (0)                                |
| Gastritis**                                                                  | 0.1% (1)                                           | 0.0% (0)               | 0.5% (2)                                             | 0.1% (3)                                |
| Fatty liver disease**                                                        | 0.4% (3)                                           | 0.0% (0)               | 0.3% (1)                                             | 0.2% (6)                                |
| Hepatitis**                                                                  | 0.3% (2)                                           | 0.0% (0)               | 0.3% (1)                                             | 0.2% (8)                                |
| Liver damage**                                                               | 0.6% (4)                                           | 0.0% (0)               | 0.3% (1)                                             | 0.1% (2)                                |
| <i>Other Clinical ICD-9/10 Diagnoses</i>                                     |                                                    |                        |                                                      |                                         |
| Drug abuse/dependence                                                        | 15.5% (109)                                        | 6.2% (58)              | 11.4% (45)                                           | 12.0% (399)                             |
| AUD + drug<br>abuse/dependence                                               | 9.5% (67)                                          | 3.8% (35)              | 5.8% (23)                                            | 6.4% (212)                              |
| Mental disorder                                                              | 75.6% (531)                                        | 59.9% (559)            | 73.6% (290)                                          | 75.0% (2,485)                           |
| AUD + mental disorder                                                        | 16.5% (116)                                        | 7.7% (72)              | 12.7% (50)                                           | 11.7% (388)                             |

SD = standard deviation; AUDIT-C = Alcohol Use Disorders Identification Test – Consumption; AUD = alcohol use disorder.

\*Number of observations with missing age: Other/Multiple Races (n=1). \*\* Alcohol-specific diagnosis.

Figure S2A. Percentage of men with an AUD diagnosis by maximum AUDIT-C score, by race and ethnicity (n=672,260).

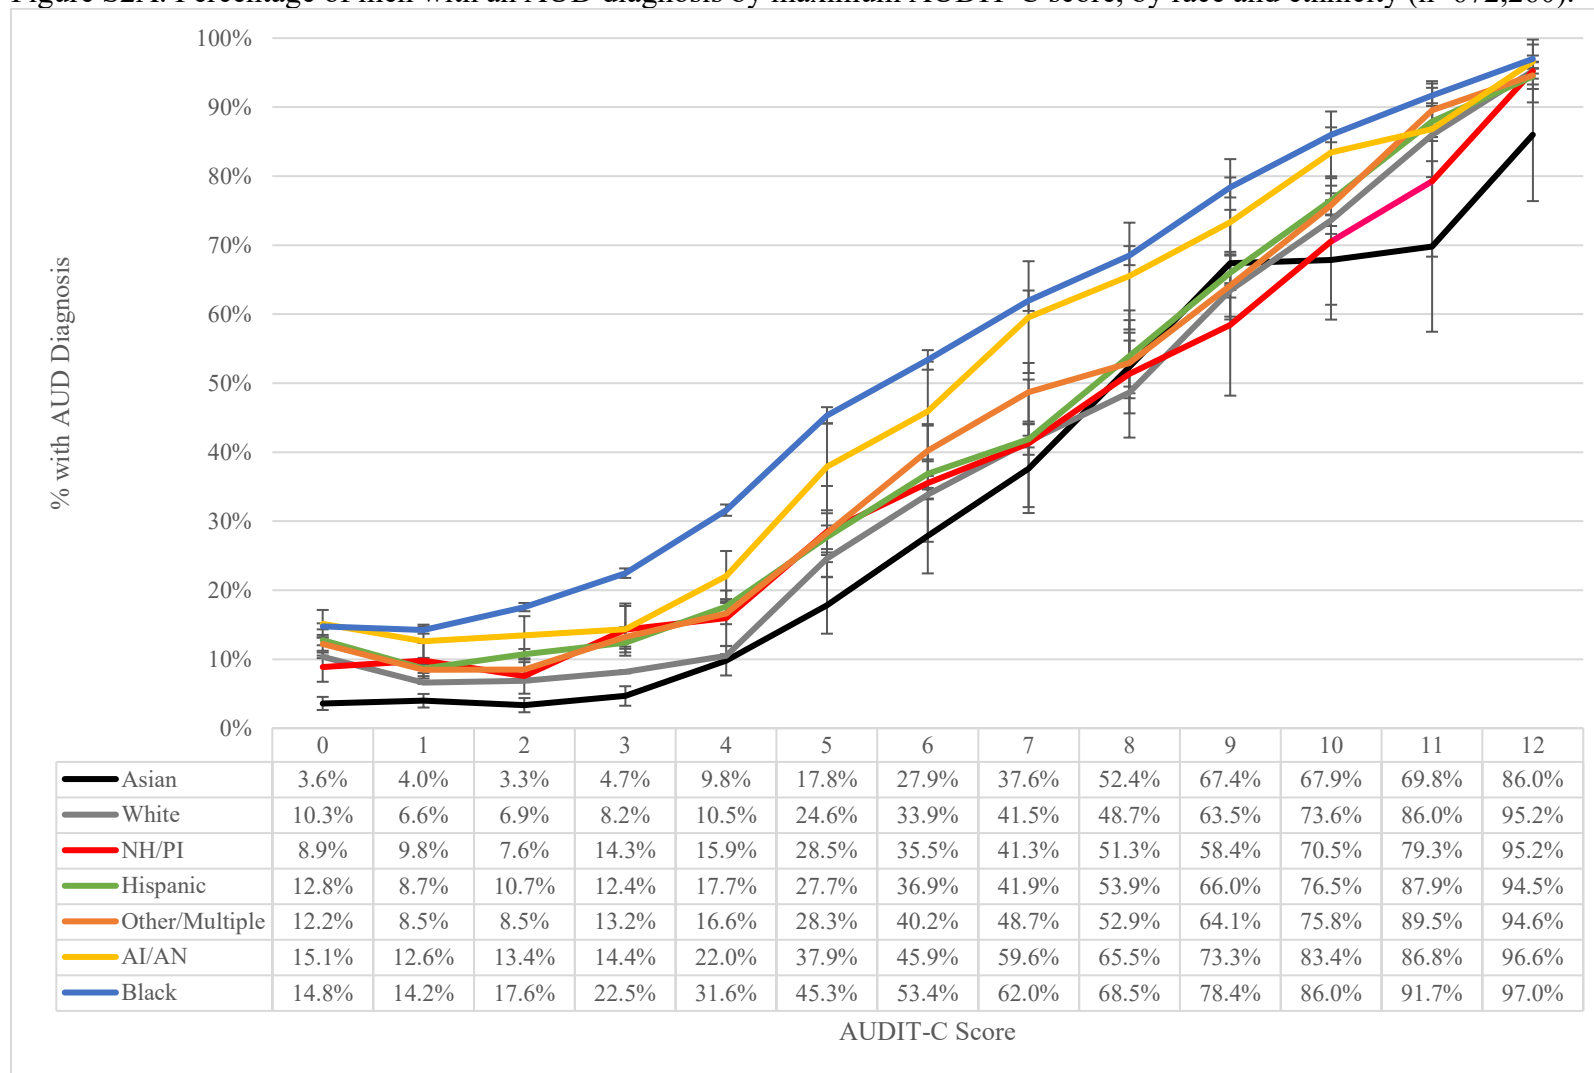

AUD=alcohol use disorder; AUDIT-C=Alcohol Use Disorders Identification Test – Consumption; NH/PI=Native Hawaiian/Pacific Islander; AI/AN=American Indian/Alaska Native.

Note: The connecting lines are for visualization purposes only and should not be interpreted as continuous.

Figure S2B. Percentage of women with an AUD diagnosis by maximum AUDIT-C score, by race and ethnicity (n=67,151).

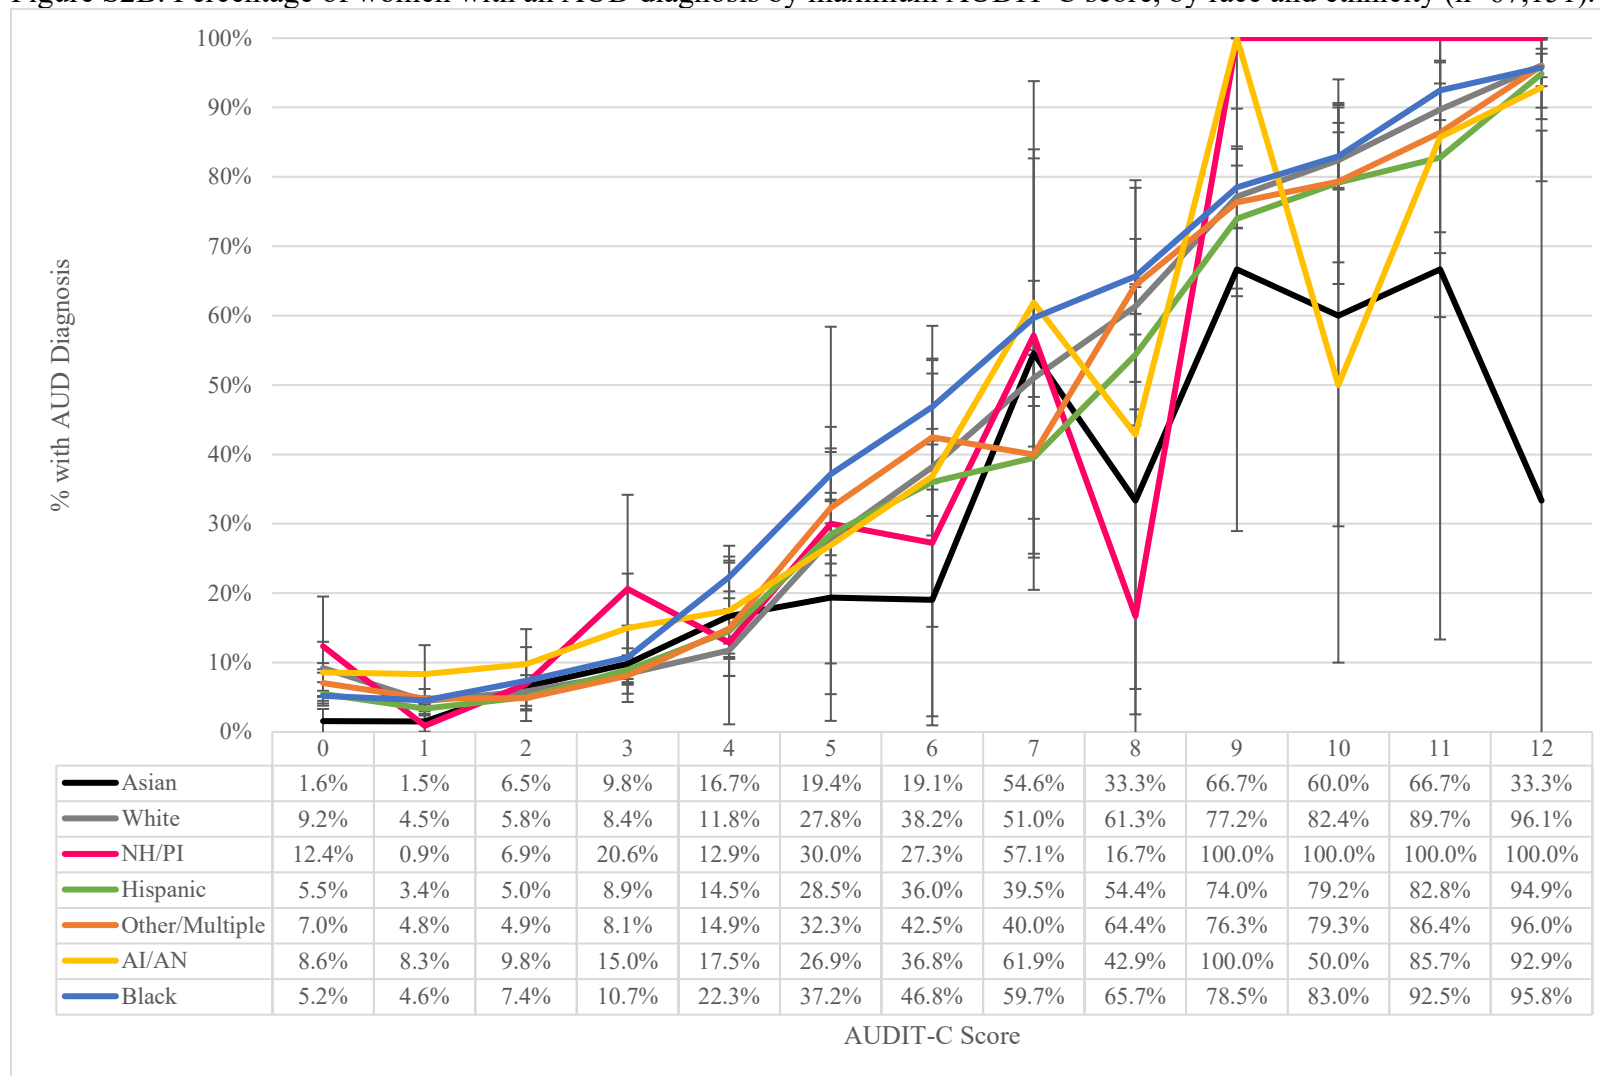

AUD=alcohol use disorder; AUDIT-C=Alcohol Use Disorders Identification Test – Consumption; NH/PI=Native Hawaiian/Pacific Islander; AI/AN=American Indian/Alaska Native.

Note: The connecting lines are for visualization purposes only and should not be interpreted as continuous.

Table S2. International Classification of Disease (ICD) 9 and 10 Diagnostic Codes.

| <b>Alcohol Use Disorder</b> |                                                        |                     |                                                                           |
|-----------------------------|--------------------------------------------------------|---------------------|---------------------------------------------------------------------------|
| <b>ICD-9 Codes</b>          |                                                        | <b>ICD-10 Codes</b> |                                                                           |
| 305.00                      | Nondependent alcohol abuse, unspecified                | F10.10              | Alcohol abuse, uncomplicated                                              |
| 305.01                      | Nondependent alcohol abuse, continuous                 | F10.11              | Alcohol abuse, in remission                                               |
| 305.02                      | Nondependent alcohol abuse, episodic                   | F10.120             | Alcohol abuse with intoxication, uncomplicated                            |
| 305.03                      | Nondependent alcohol abuse, in remission               | F10.121             | Alcohol abuse with intoxication, delirium                                 |
| 303.00                      | Acute alcoholic intoxication, unspecified              | F10.129             | Alcohol abuse with intoxication, unspecified                              |
| 303.01                      | Acute alcoholic intoxication, continuous               | F10.14              | Alcohol abuse with alcohol-induced mood disorder                          |
| 303.02                      | Acute alcoholic intoxication, episodic                 | F10.150             | Alcohol abuse with alcohol-induced psychotic disorder with delusions      |
| 303.03                      | Acute alcoholic intoxication, in remission             | F10.151             | Alcohol abuse with alcohol-induced psychotic disorder with hallucinations |
| 303.90                      | Other and unspecified alcohol dependence, unspecified  | F10.159             | Alcohol abuse with alcohol-induced psychotic disorder, unspecified        |
| 303.91                      | Other and unspecified alcohol dependence, continuous   | F10.180             | Alcohol abuse with alcohol-induced anxiety disorder                       |
| 303.92                      | Other and unspecified alcohol dependence, episodic     | F10.181             | Alcohol abuse with alcohol-induced sexual dysfunction                     |
| 303.93                      | Other and unspecified alcohol dependence, in remission | F10.182             | Alcohol abuse with alcohol-induced sleep disorder                         |
|                             |                                                        | F10.188             | Alcohol abuse with other alcohol-induced disorder                         |
|                             |                                                        | F10.19              | Alcohol abuse with unspecified alcohol-induced disorder                   |
|                             |                                                        | F10.20              | Alcohol dependence, uncomplicated                                         |
|                             |                                                        | F10.21              | Alcohol dependence, in remission                                          |
|                             |                                                        | F10.220             | Alcohol dependence with intoxication, uncomplicated                       |
|                             |                                                        | F10.221             | Alcohol dependence with intoxication delirium                             |
|                             |                                                        | F10.229             | Alcohol dependence with intoxication, unspecified                         |
|                             |                                                        | F10.230             | Alcohol dependence with withdrawal, uncomplicated                         |
|                             |                                                        | F10.231             | Alcohol dependence with withdrawal delirium                               |

|  |         |                                                                                |
|--|---------|--------------------------------------------------------------------------------|
|  | F10.232 | Alcohol dependence with withdrawal with perceptual disturbance                 |
|  | F10.239 | Alcohol dependence with withdrawal, unspecified                                |
|  | F10.24  | Alcohol dependence with alcohol-induced mood disorder                          |
|  | F10.250 | Alcohol dependence with alcohol-induced psychotic disorder with delusions      |
|  | F10.251 | Alcohol dependence with alcohol-induced psychotic disorder with hallucinations |
|  | F10.259 | Alcohol dependence with alcohol-induced psychotic disorder, unspecified        |
|  | F10.26  | Alcohol dependence with alcohol-induced persisting amnesic disorder            |
|  | F10.27  | Alcohol dependence with alcohol-induced persisting dementia                    |
|  | F10.280 | Alcohol dependence with alcohol-induced anxiety disorder                       |
|  | F10.281 | Alcohol dependence with alcohol-induced sexual dysfunction                     |
|  | F10.282 | Alcohol dependence with alcohol-induced sleep disorder                         |
|  | F10.288 | Alcohol dependence with other alcohol-induced disorder                         |
|  | F10.29  | Alcohol dependence with unspecified alcohol-induced disorder                   |

### Alcohol-Related Disorders

| ICD-9 Codes |                                                   | ICD-10 Codes |                                              |
|-------------|---------------------------------------------------|--------------|----------------------------------------------|
| 571.2       | Alcoholic cirrhosis of liver                      | K70.3        | Alcoholic cirrhosis of liver                 |
|             |                                                   | K70.30       | Alcoholic cirrhosis of liver without ascites |
|             |                                                   | K70.31       | Alcoholic cirrhosis of liver with ascites    |
| 357.5       | Alcoholic polyneuropathy                          | G62.1        | Alcoholic polyneuropathy                     |
| 425.5       | Alcoholic cardiomyopathy                          | I42.6        | Alcoholic cardiomyopathy                     |
| 535.3       | Alcoholic gastritis                               | K29.2        | Alcoholic gastritis                          |
| 535.30      | Alcoholic gastritis without mention of hemorrhage | K29.20       | Alcoholic gastritis without bleeding         |
| 535.31      | Alcoholic gastritis with hemorrhage               | K29.21       | Alcoholic gastritis with bleeding            |

|                                 |                                                           |                     |                                                                         |
|---------------------------------|-----------------------------------------------------------|---------------------|-------------------------------------------------------------------------|
| 571.0                           | Alcoholic fatty liver                                     | K70.0               | Alcoholic fatty liver                                                   |
| 571.1                           | Acute alcoholic hepatitis                                 | K70.1               | Alcoholic hepatitis                                                     |
|                                 |                                                           | K70.10              | Alcoholic hepatitis without ascites                                     |
|                                 |                                                           | K70.11              | Alcoholic hepatitis with ascites                                        |
| 571.3                           | Alcoholic liver damage, unspecified                       | K70.9               | Alcoholic liver disease, unspecified                                    |
| <b>Drug Abuse or Dependence</b> |                                                           |                     |                                                                         |
| <b>ICD-9 Codes</b>              |                                                           | <b>ICD-10 Codes</b> |                                                                         |
| 304                             | Drug dependence                                           | F11.1               | Opioid abuse                                                            |
| 304.0                           | Opioid type dependence                                    | F11.10              | Opioid abuse, uncomplicated                                             |
| 304.00                          | Opioid type dependence, unspecified                       | F11.11              | Opioid abuse, in remission                                              |
| 304.01                          | Opioid type dependence, continuous                        | F11.12              | Opioid abuse with intoxication                                          |
| 304.02                          | Opioid type dependence, episodic                          | F11.120             | Opioid abuse with intoxication, uncomplicated                           |
| 304.03                          | Opioid type dependence, in remission                      | F11.121             | Opioid abuse with intoxication, delirium                                |
| 304.1                           | Sedative, hypnotic or anxiolytic dependence               | F11.122             | Opioid abuse with intoxication, with perceptual disturbance             |
| 304.10                          | Sedative, hypnotic or anxiolytic dependence, unspecified  | F11.129             | Opioid abuse with intoxication, unspecified                             |
| 304.11                          | Sedative, hypnotic or anxiolytic dependence, continuous   | F11.14              | Opioid abuse with opioid-induced mood disorder                          |
| 304.12                          | Sedative, hypnotic or anxiolytic dependence, episodic     | F11.15              | Opioid abuse with opioid-induced psychotic disorder                     |
| 304.13                          | Sedative, hypnotic or anxiolytic dependence, in remission | F11.150             | Opioid abuse with opioid-induced psychotic disorder with delusions      |
| 304.2                           | Cocaine dependence                                        | F11.151             | Opioid abuse with opioid-induced psychotic disorder with hallucinations |
| 304.20                          | Cocaine dependence, unspecified                           | F11.159             | Opioid abuse with opioid-induced psychotic disorder, unspecified        |
| 304.21                          | Cocaine dependence, continuous                            | F11.18              | Opioid abuse with other opioid-induced disorder                         |
| 304.22                          | Cocaine dependence, episodic                              | F11.181             | Opioid abuse with opioid-induced sexual dysfunction                     |
| 304.23                          | Cocaine dependence, in remission                          | F11.182             | Opioid abuse with opioid-induced sleep disorder                         |
| 304.3                           | Cannabis dependence                                       | F11.188             | Opioid abuse with other opioid-induced disorder                         |
| 304.30                          | Cannabis dependence, unspecified                          | F11.19              | Opioid abuse with unspecified opioid-induced disorder                   |
| 304.31                          | Cannabis dependence, continuous                           | F11.2               | Opioid dependence                                                       |
| 304.32                          | Cannabis dependence, episodic                             | F11.20              | Opioid dependence, uncomplicated                                        |



|        |                                                                               |         |                                                                              |
|--------|-------------------------------------------------------------------------------|---------|------------------------------------------------------------------------------|
| 304.33 | Cannabis dependence, in remission                                             | F11.21  | Opioid dependence, in remission                                              |
| 304.4  | Amphetamine and other psychostimulant dependence                              | F11.22  | Opioid dependence with intoxication                                          |
| 304.40 | Amphetamine and other psychostimulant dependence, unspecified                 | F11.220 | Opioid dependence with intoxication, uncomplicated                           |
| 304.41 | Amphetamine and other psychostimulant dependence, continuous                  | F11.221 | Opioid dependence with intoxication delirium                                 |
| 304.42 | Amphetamine and other psychostimulant dependence, episodic                    | F11.222 | Opioid dependence with intoxication with perceptual disturbance              |
| 304.43 | Amphetamine and other psychostimulant dependence, in remission                | F11.229 | Opioid dependence with intoxication, unspecified                             |
| 304.5  | Hallucinogen dependence                                                       | F11.23  | Opioid dependence with withdrawal                                            |
| 304.50 | Hallucinogen dependence, unspecified                                          | F11.24  | Opioid dependence with opioid-induced mood disorder                          |
| 304.51 | Hallucinogen dependence, continuous                                           | F11.25  | Opioid dependence with opioid-induced psychotic disorder                     |
| 304.52 | Hallucinogen dependence, episodic                                             | F11.250 | Opioid dependence with opioid-induced psychotic disorder with delusions      |
| 304.53 | Hallucinogen dependence, in remission                                         | F11.251 | Opioid dependence with opioid-induced psychotic disorder with hallucinations |
| 304.6  | Other specified drug dependence                                               | F11.259 | Opioid dependence with opioid-induced psychotic disorder, unspecified        |
| 304.60 | Other specified drug dependence, unspecified                                  | F11.28  | Opioid dependence with other opioid-induced disorder                         |
| 304.61 | Other specified drug dependence, continuous                                   | F11.281 | Opioid dependence with opioid-induced sexual dysfunction                     |
| 304.62 | Other specified drug dependence, episodic                                     | F11.282 | Opioid dependence with opioid-induced sleep disorder                         |
| 304.63 | Other specified drug dependence, in remission                                 | F11.288 | Opioid dependence with other opioid-induced disorder                         |
| 304.7  | Combinations of opioid type drug with any other drug dependence               | F11.29  | Opioid dependence with unspecified opioid-induced disorder                   |
| 304.70 | Combinations of opioid type drug with any other drug dependence, unspecified  | F12.1   | Cannabis abuse                                                               |
| 304.71 | Combinations of opioid type drug with any other drug dependence, continuous   | F12.10  | Cannabis abuse, uncomplicated                                                |
| 304.72 | Combinations of opioid type drug with any other drug dependence, episodic     | F12.11  | Cannabis abuse, in remission                                                 |
| 304.73 | Combinations of opioid type drug with any other drug dependence, in remission | F12.12  | Cannabis abuse with intoxication                                             |
| 304.8  | Combinations of drug dependence excluding opioid type drug                    | F12.120 | Cannabis abuse with intoxication                                             |
| 304.80 | Combinations of drug dependence excluding opioid type drug, unspecified       | F12.121 | Cannabis abuse with intoxication delirium                                    |
| 304.81 | Combinations of drug dependence excluding opioid type drug, continuous        | F12.122 | Cannabis abuse with intoxication with perceptual disturbance                 |
| 304.82 | Combinations of drug dependence excluding opioid type drug, episodic          | F12.129 | Cannabis abuse with intoxication, unspecified                                |
| 304.83 | Combinations of drug dependence excluding opioid type drug, in remission      | F12.15  | Cannabis abuse with psychotic disorder                                       |
| 304.9  | Unspecified drug dependence                                                   | F12.150 | Cannabis abuse with psychotic disorder with delusions                        |
| 304.90 | Unspecified drug dependence, unspecified                                      | F12.151 | Cannabis abuse with psychotic disorder with hallucinations                   |
| 304.91 | Unspecified drug dependence, continuous                                       | F12.159 | Cannabis abuse with psychotic disorder, unspecified                          |

|        |                                                                  |         |                                                                         |
|--------|------------------------------------------------------------------|---------|-------------------------------------------------------------------------|
| 304.92 | Unspecified drug dependence, episodic                            | F12.18  | Cannabis abuse with other cannabis-induced disorder                     |
| 304.93 | Unspecified drug dependence, in remission                        | F12.180 | Cannabis abuse with cannabis-induced anxiety disorder                   |
| 305.2  | Nondependent cannabis abuse                                      | F12.188 | Cannabis abuse with other cannabis-induced disorder                     |
| 305.20 | Cannabis abuse, unspecified                                      | F12.19  | Cannabis abuse with unspecified cannabis-induced disorder               |
| 305.21 | Cannabis abuse, continuous                                       | F12.2   | Cannabis dependence                                                     |
| 305.22 | Cannabis abuse, episodic                                         | F12.20  | Cannabis dependence, uncomplicated                                      |
| 305.23 | Cannabis abuse, in remission                                     | F12.21  | Cannabis dependence, in remission                                       |
| 305.3  | Nondependent hallucinogen abuse                                  | F12.22  | Cannabis dependence with intoxication                                   |
| 305.30 | Hallucinogen abuse, unspecified                                  | F12.220 | Cannabis dependence with intoxication, uncomplicated                    |
| 305.31 | Hallucinogen abuse, continuous                                   | F12.221 | Cannabis dependence with intoxication delirium                          |
| 305.32 | Hallucinogen abuse, episodic                                     | F12.222 | Cannabis dependence with intoxication with perceptual disturbance       |
| 305.33 | Hallucinogen abuse, in remission                                 | F12.229 | Cannabis dependence with intoxication, unspecified                      |
| 305.4  | Nondependent sedative, hypnotic or anxiolytic abuse              | F12.23  | Cannabis dependence with withdrawal                                     |
| 305.40 | Sedative, hypnotic or anxiolytic abuse, unspecified              | F12.25  | Cannabis dependence with psychotic disorder                             |
| 305.41 | Sedative, hypnotic or anxiolytic abuse, continuous               | F12.250 | Cannabis dependence with psychotic disorder with delusions              |
| 305.42 | Sedative, hypnotic or anxiolytic abuse, episodic                 | F12.251 | Cannabis dependence with psychotic disorder with hallucinations         |
| 305.43 | Sedative, hypnotic or anxiolytic abuse, in remission             | F12.259 | Cannabis dependence with psychotic disorder, unspecified                |
| 305.5  | Nondependent opioid abuse                                        | F12.28  | Cannabis dependence with other cannabis-induced disorder                |
| 305.50 | Opioid abuse, unspecified                                        | F12.280 | Cannabis dependence with cannabis-induced anxiety disorder              |
| 305.51 | Opioid abuse, continuous                                         | F12.288 | Cannabis dependence with other cannabis-induced disorder                |
| 305.52 | Opioid abuse, episodic                                           | F12.29  | Cannabis dependence with unspecified cannabis-induced disorder          |
| 305.53 | Opioid abuse, in remission                                       | F12.90  | Cannabis use, uncomplicated                                             |
| 305.6  | Nondependent cocaine abuse                                       | F13.1   | Sedative, hypnotic or anxiolytic-related abuse                          |
| 305.60 | Cocaine abuse, unspecified                                       | F13.10  | Sedative, hypnotic or anxiolytic abuse, uncomplicated                   |
| 305.61 | Cocaine abuse, continuous                                        | F13.11  | Sedative, hypnotic or anxiolytic abuse, in remission                    |
| 305.62 | Cocaine abuse, episodic                                          | F13.12  | Sedative, hypnotic or anxiolytic abuse with intoxication                |
| 305.63 | Cocaine abuse, in remission                                      | F13.120 | Sedative, hypnotic or anxiolytic abuse with intoxication, uncomplicated |
| 305.7  | Nondependent amphetamine or related acting sympathomimetic abuse | F13.121 | Sedative, hypnotic or anxiolytic abuse with intoxication delirium       |
| 305.70 | Amphetamine or related acting sympathomimetic abuse, unspecified | F13.129 | Sedative, hypnotic or anxiolytic abuse with intoxication, unspecified   |

|        |                                                                   |         |                                                                                                                             |
|--------|-------------------------------------------------------------------|---------|-----------------------------------------------------------------------------------------------------------------------------|
| 305.71 | Amphetamine or related acting sympathomimetic abuse, continuous   | F13.14  | Sedative, hypnotic or anxiolytic abuse with sedative, hypnotic or anxiolytic-induced mood disorder                          |
| 305.72 | Amphetamine or related acting sympathomimetic abuse, episodic     | F13.15  | Sedative, hypnotic or anxiolytic abuse with sedative, hypnotic or anxiolytic-induced psychotic disorder                     |
| 305.73 | Amphetamine or related acting sympathomimetic abuse, in remission | F13.150 | Sedative, hypnotic or anxiolytic abuse with sedative, hypnotic or anxiolytic-induced psychotic disorder with delusions      |
| 305.8  | Nondependent antidepressant type abuse                            | F13.151 | Sedative, hypnotic or anxiolytic abuse with sedative, hypnotic or anxiolytic-induced psychotic disorder with hallucinations |
| 305.80 | Antidepressant type abuse, unspecified                            | F13.159 | Sedative, hypnotic or anxiolytic abuse with sedative, hypnotic or anxiolytic-induced psychotic disorder, unspecified        |
| 305.81 | Antidepressant type abuse, continuous                             | F13.18  | Sedative, hypnotic or anxiolytic abuse with other sedative, hypnotic or anxiolytic-induced disorders                        |
| 305.82 | Antidepressant type abuse, episodic                               | F13.180 | Sedative, hypnotic or anxiolytic abuse with sedative, hypnotic or anxiolytic-induced anxiety disorder                       |
| 305.83 | Antidepressant type abuse, in remission                           | F13.181 | Sedative, hypnotic or anxiolytic abuse with sedative, hypnotic or anxiolytic-induced sexual dysfunction                     |
| 305.9  | Nondependent other mixed or unspecified drug abuse                | F13.182 | Sedative, hypnotic or anxiolytic abuse with sedative, hypnotic or anxiolytic-induced sleep disorder                         |
| 305.90 | Other, mixed, or unspecified drug abuse, unspecified              | F13.188 | Sedative, hypnotic or anxiolytic abuse with other sedative, hypnotic or anxiolytic-induced disorder                         |
| 305.91 | Other, mixed, or unspecified drug abuse, continuous               | F13.19  | Sedative, hypnotic or anxiolytic abuse with unspecified sedative, hypnotic or anxiolytic-induced disorder                   |
| 305.92 | Other, mixed, or unspecified drug abuse, episodic                 | F13.2   | Sedative, hypnotic or anxiolytic-related dependence                                                                         |
| 305.93 | Other, mixed, or unspecified drug abuse, in remission             | F13.20  | Sedative, hypnotic or anxiolytic dependence, uncomplicated                                                                  |
|        |                                                                   | F13.21  | Sedative, hypnotic or anxiolytic dependence, in remission                                                                   |
|        |                                                                   | F13.22  | Sedative, hypnotic or anxiolytic dependence with intoxication                                                               |
|        |                                                                   | F13.220 | Sedative, hypnotic or anxiolytic dependence with intoxication, uncomplicated                                                |
|        |                                                                   | F13.221 | Sedative, hypnotic or anxiolytic dependence with intoxication delirium                                                      |
|        |                                                                   | F13.229 | Sedative, hypnotic or anxiolytic dependence with intoxication, unspecified                                                  |
|        |                                                                   | F13.23  | Sedative, hypnotic or anxiolytic dependence with withdrawal                                                                 |
|        |                                                                   | F13.230 | Sedative, hypnotic or anxiolytic dependence with withdrawal, uncomplicated                                                  |
|        |                                                                   | F13.231 | Sedative, hypnotic or anxiolytic dependence with withdrawal delirium                                                        |
|        |                                                                   | F13.232 | Sedative, hypnotic or anxiolytic dependence with withdrawal with perceptual disturbance                                     |
|        |                                                                   | F13.239 | Sedative, hypnotic or anxiolytic dependence with withdrawal, unspecified                                                    |
|        |                                                                   | F13.24  | Sedative, hypnotic or anxiolytic dependence with sedative, hypnotic or anxiolytic-induced mood disorder                     |
|        |                                                                   | F13.25  | Sedative, hypnotic or anxiolytic dependence with sedative, hypnotic or anxiolytic-induced psychotic disorder                |

|  |         |                                                                                                                                  |
|--|---------|----------------------------------------------------------------------------------------------------------------------------------|
|  | F13.250 | Sedative, hypnotic or anxiolytic dependence with sedative, hypnotic or anxiolytic-induced psychotic disorder with delusions      |
|  | F13.251 | Sedative, hypnotic or anxiolytic dependence with sedative, hypnotic or anxiolytic-induced psychotic disorder with hallucinations |
|  | F13.259 | Sedative, hypnotic or anxiolytic dependence with sedative, hypnotic or anxiolytic-induced psychotic disorder, unspecified        |
|  | F13.26  | Sedative, hypnotic or anxiolytic dependence with sedative, hypnotic or anxiolytic-induced persisting amnesic disorder            |
|  | F13.27  | Sedative, hypnotic or anxiolytic dependence with sedative, hypnotic or anxiolytic-induced persisting dementia                    |
|  | F13.28  | Sedative, hypnotic or anxiolytic dependence with other sedative, hypnotic or anxiolytic-induced disorders                        |
|  | F13.280 | Sedative, hypnotic or anxiolytic dependence with sedative, hypnotic or anxiolytic-induced anxiety disorder                       |
|  | F13.281 | Sedative, hypnotic or anxiolytic dependence with sedative, hypnotic or anxiolytic-induced sexual dysfunction                     |
|  | F13.282 | Sedative, hypnotic or anxiolytic dependence with sedative, hypnotic or anxiolytic-induced sleep disorder                         |
|  | F13.288 | Sedative, hypnotic or anxiolytic dependence with other sedative, hypnotic or anxiolytic-induced disorder                         |
|  | F13.29  | Sedative, hypnotic or anxiolytic dependence with unspecified sedative, hypnotic or anxiolytic-induced disorder                   |
|  | F14.1   | Cocaine abuse                                                                                                                    |
|  | F14.10  | Cocaine abuse, uncomplicated                                                                                                     |
|  | F14.11  | Cocaine abuse, in remission                                                                                                      |
|  | F14.12  | Cocaine abuse with intoxication                                                                                                  |
|  | F14.120 | Cocaine abuse with intoxication, uncomplicated                                                                                   |
|  | F14.121 | Cocaine abuse with intoxication with delirium                                                                                    |
|  | F14.122 | Cocaine abuse with intoxication with perceptual disturbance                                                                      |
|  | F14.129 | Cocaine abuse with intoxication, unspecified                                                                                     |
|  | F14.14  | Cocaine abuse with cocaine-induced mood disorder                                                                                 |
|  | F14.15  | Cocaine abuse with cocaine-induced psychotic disorder                                                                            |
|  | F14.150 | Cocaine abuse with cocaine-induced psychotic disorder with delusions                                                             |
|  | F14.151 | Cocaine abuse with cocaine-induced psychotic disorder with hallucinations                                                        |
|  | F14.159 | Cocaine abuse with cocaine-induced psychotic disorder, unspecified                                                               |
|  | F14.18  | Cocaine abuse with other cocaine-induced disorder                                                                                |
|  | F14.180 | Cocaine abuse with cocaine-induced anxiety disorder                                                                              |

|  |         |                                                                                |
|--|---------|--------------------------------------------------------------------------------|
|  | F14.181 | Cocaine abuse with cocaine-induced sexual dysfunction                          |
|  | F14.182 | Cocaine abuse with cocaine-induced sleep disorder                              |
|  | F14.188 | Cocaine abuse with other cocaine-induced disorder                              |
|  | F14.19  | Cocaine abuse with unspecified cocaine-induced disorder                        |
|  | F14.2   | Cocaine dependence                                                             |
|  | F14.20  | Cocaine dependence, uncomplicated                                              |
|  | F14.21  | Cocaine dependence, in remission                                               |
|  | F14.22  | Cocaine dependence with intoxication                                           |
|  | F14.220 | Cocaine dependence with intoxication, uncomplicated                            |
|  | F14.221 | Cocaine dependence with intoxication delirium                                  |
|  | F14.222 | Cocaine dependence with intoxication with perceptual disturbance               |
|  | F14.229 | Cocaine dependence with intoxication, unspecified                              |
|  | F14.23  | Cocaine dependence with withdrawal                                             |
|  | F14.24  | Cocaine dependence with cocaine-induced mood disorder                          |
|  | F14.25  | Cocaine dependence with cocaine-induced psychotic disorder                     |
|  | F14.250 | Cocaine dependence with cocaine-induced psychotic disorder with delusions      |
|  | F14.251 | Cocaine dependence with cocaine-induced psychotic disorder with hallucinations |
|  | F14.259 | Cocaine dependence with cocaine-induced psychotic disorder, unspecified        |
|  | F14.28  | Cocaine dependence with other cocaine-induced disorder                         |
|  | F14.280 | Cocaine dependence with cocaine-induced anxiety disorder                       |
|  | F14.281 | Cocaine dependence with cocaine-induced sexual dysfunction                     |
|  | F14.282 | Cocaine dependence with cocaine-induced sleep disorder                         |
|  | F14.288 | Cocaine dependence with other cocaine-induced disorder                         |
|  | F14.29  | Cocaine dependence with unspecified cocaine-induced disorder                   |
|  | F15.1   | Other stimulant abuse                                                          |
|  | F15.10  | Other stimulant abuse, uncomplicated                                           |
|  | F15.11  | Other stimulant abuse, in remission                                            |
|  | F15.12  | Other stimulant abuse with intoxication                                        |
|  | F15.120 | Other stimulant abuse with intoxication, uncomplicated                         |

|  |         |                                                                                          |
|--|---------|------------------------------------------------------------------------------------------|
|  | F15.121 | Other stimulant abuse with intoxication delirium                                         |
|  | F15.122 | Other stimulant abuse with intoxication with perceptual disturbance                      |
|  | F15.129 | Other stimulant abuse with intoxication, unspecified                                     |
|  | F15.14  | Other stimulant abuse with stimulant-induced mood disorder                               |
|  | F15.15  | Other stimulant abuse with stimulant-induced psychotic disorder                          |
|  | F15.150 | Other stimulant abuse with stimulant-induced psychotic disorder with delusions           |
|  | F15.151 | Other stimulant abuse with stimulant-induced psychotic disorder with hallucinations      |
|  | F15.159 | Other stimulant abuse with stimulant-induced psychotic disorder, unspecified             |
|  | F15.18  | Other stimulant abuse with other stimulant-induced disorder                              |
|  | F15.180 | Other stimulant abuse with stimulant-induced anxiety disorder                            |
|  | F15.181 | Other stimulant abuse with stimulant-induced sexual dysfunction                          |
|  | F15.182 | Other stimulant abuse with stimulant-induced sleep disorder                              |
|  | F15.188 | Other stimulant abuse with other stimulant-induced disorder                              |
|  | F15.19  | Other stimulant abuse with unspecified stimulant-induced disorder                        |
|  | F15.2   | Other stimulant dependence                                                               |
|  | F15.20  | Other stimulant dependence, uncomplicated                                                |
|  | F15.21  | Other stimulant dependence, in remission                                                 |
|  | F15.22  | Other stimulant dependence with intoxication                                             |
|  | F15.220 | Other stimulant dependence with intoxication, uncomplicated                              |
|  | F15.221 | Other stimulant dependence with intoxication delirium                                    |
|  | F15.222 | Other stimulant dependence with intoxication with perceptual disturbance                 |
|  | F15.229 | Other stimulant dependence with intoxication, unspecified                                |
|  | F15.23  | Other stimulant dependence with withdrawal                                               |
|  | F15.24  | Other stimulant dependence with stimulant-induced mood disorder                          |
|  | F15.25  | Other stimulant dependence with stimulant-induced psychotic disorder                     |
|  | F15.250 | Other stimulant dependence with stimulant-induced psychotic disorder with delusions      |
|  | F15.251 | Other stimulant dependence with stimulant-induced psychotic disorder with hallucinations |
|  | F15.259 | Other stimulant dependence with stimulant-induced psychotic disorder, unspecified        |
|  | F15.28  | Other stimulant dependence with other stimulant-induced disorder                         |

|         |                                                                                     |
|---------|-------------------------------------------------------------------------------------|
| F15.280 | Other stimulant dependence with stimulant-induced anxiety disorder                  |
| F15.281 | Other stimulant dependence with stimulant-induced sexual dysfunction                |
| F15.282 | Other stimulant dependence with stimulant-induced sleep disorder                    |
| F15.288 | Other stimulant dependence with other stimulant-induced disorder                    |
| F15.29  | Other stimulant dependence with unspecified stimulant-induced disorder              |
| F16.1   | Hallucinogen abuse                                                                  |
| F16.10  | Hallucinogen abuse, uncomplicated                                                   |
| F16.11  | Hallucinogen abuse, in remission                                                    |
| F16.12  | Hallucinogen abuse with intoxication                                                |
| F16.120 | Hallucinogen abuse with intoxication, uncomplicated                                 |
| F16.121 | Hallucinogen abuse with intoxication with delirium                                  |
| F16.122 | Hallucinogen abuse with intoxication with perceptual disturbance                    |
| F16.129 | Hallucinogen abuse with intoxication, unspecified                                   |
| F16.14  | Hallucinogen abuse with hallucinogen-induced mood disorder                          |
| F16.15  | Hallucinogen abuse with hallucinogen-induced psychotic disorder                     |
| F16.150 | Hallucinogen abuse with hallucinogen-induced psychotic disorder with delusions      |
| F16.151 | Hallucinogen abuse with hallucinogen-induced psychotic disorder with hallucinations |
| F16.159 | Hallucinogen abuse with hallucinogen-induced psychotic disorder, unspecified        |
| F16.18  | Hallucinogen abuse with other hallucinogen-induced disorder                         |
| F16.180 | Hallucinogen abuse with hallucinogen-induced anxiety disorder                       |
| F16.183 | Hallucinogen abuse with hallucinogen persisting perception disorder (flashbacks)    |
| F16.188 | Hallucinogen abuse with other hallucinogen-induced disorder                         |
| F16.19  | Hallucinogen abuse with unspecified hallucinogen-induced disorder                   |
| F16.2   | Hallucinogen dependence                                                             |
| F16.20  | Hallucinogen dependence, uncomplicated                                              |
| F16.21  | Hallucinogen dependence, in remission                                               |
| F16.22  | Hallucinogen dependence with intoxication                                           |
| F16.220 | Hallucinogen dependence with intoxication, uncomplicated                            |
| F16.221 | Hallucinogen dependence with intoxication with delirium                             |

|  |         |                                                                                          |
|--|---------|------------------------------------------------------------------------------------------|
|  | F16.229 | Hallucinogen dependence with intoxication, unspecified                                   |
|  | F16.24  | Hallucinogen dependence with hallucinogen-induced mood disorder                          |
|  | F16.25  | Hallucinogen dependence with hallucinogen-induced psychotic disorder                     |
|  | F16.250 | Hallucinogen dependence with hallucinogen-induced psychotic disorder with delusions      |
|  | F16.251 | Hallucinogen dependence with hallucinogen-induced psychotic disorder with hallucinations |
|  | F16.259 | Hallucinogen dependence with hallucinogen-induced psychotic disorder, unspecified        |
|  | F16.28  | Hallucinogen dependence with other hallucinogen-induced disorder                         |
|  | F16.280 | Hallucinogen dependence with hallucinogen-induced anxiety disorder                       |
|  | F16.283 | Hallucinogen dependence with hallucinogen persisting perception disorder (flashbacks)    |
|  | F16.288 | Hallucinogen dependence with other hallucinogen-induced disorder                         |
|  | F16.29  | Hallucinogen dependence with unspecified hallucinogen-induced disorder                   |
|  | F18.1   | Inhalant abuse                                                                           |
|  | F18.10  | Inhalant abuse, uncomplicated                                                            |
|  | F18.11  | Inhalant abuse, in remission                                                             |
|  | F18.12  | Inhalant abuse with intoxication                                                         |
|  | F18.120 | Inhalant abuse with intoxication, uncomplicated                                          |
|  | F18.121 | Inhalant abuse with intoxication delirium                                                |
|  | F18.129 | Inhalant abuse with intoxication, unspecified                                            |
|  | F18.14  | Inhalant abuse with inhalant-induced mood disorder                                       |
|  | F18.15  | Inhalant abuse with inhalant-induced psychotic disorder                                  |
|  | F18.150 | Inhalant abuse with inhalant-induced psychotic disorder with delusions                   |
|  | F18.151 | Inhalant abuse with inhalant-induced psychotic disorder with hallucinations              |
|  | F18.159 | Inhalant abuse with inhalant-induced psychotic disorder, unspecified                     |
|  | F18.17  | Inhalant abuse with inhalant-induced dementia                                            |
|  | F18.18  | Inhalant abuse with other inhalant-induced disorders                                     |
|  | F18.180 | Inhalant abuse with inhalant-induced anxiety disorder                                    |
|  | F18.188 | Inhalant abuse with other inhalant-induced disorder                                      |
|  | F18.19  | Inhalant abuse with unspecified inhalant-induced disorder                                |
|  | F18.2   | Inhalant dependence                                                                      |



|  |         |                                                                                                               |
|--|---------|---------------------------------------------------------------------------------------------------------------|
|  | F18.20  | Inhalant dependence, uncomplicated                                                                            |
|  | F18.21  | Inhalant dependence, in remission                                                                             |
|  | F18.22  | Inhalant dependence with intoxication                                                                         |
|  | F18.220 | Inhalant dependence with intoxication, uncomplicated                                                          |
|  | F18.221 | Inhalant dependence with intoxication delirium                                                                |
|  | F18.229 | Inhalant dependence with intoxication, unspecified                                                            |
|  | F18.24  | Inhalant dependence with inhalant-induced mood disorder                                                       |
|  | F18.25  | Inhalant dependence with inhalant-induced psychotic disorder                                                  |
|  | F18.250 | Inhalant dependence with inhalant-induced psychotic disorder with delusions                                   |
|  | F18.251 | Inhalant dependence with inhalant-induced psychotic disorder with hallucinations                              |
|  | F18.259 | Inhalant dependence with inhalant-induced psychotic disorder, unspecified                                     |
|  | F18.27  | Inhalant dependence with inhalant-induced dementia                                                            |
|  | F18.28  | Inhalant dependence with other inhalant-induced disorders                                                     |
|  | F18.280 | Inhalant dependence with inhalant-induced anxiety disorder                                                    |
|  | F18.288 | Inhalant dependence with other inhalant-induced disorder                                                      |
|  | F18.29  | Inhalant dependence with unspecified inhalant-induced disorder                                                |
|  | F19.1   | Other psychoactive substance abuse                                                                            |
|  | F19.10  | Other psychoactive substance abuse, uncomplicated                                                             |
|  | F19.11  | Other psychoactive substance abuse, in remission                                                              |
|  | F19.12  | Other psychoactive substance abuse with intoxication                                                          |
|  | F19.120 | Other psychoactive substance abuse with intoxication, uncomplicated                                           |
|  | F19.121 | Other psychoactive substance abuse with intoxication delirium                                                 |
|  | F19.122 | Other psychoactive substance abuse with intoxication with perceptual disturbances                             |
|  | F19.129 | Other psychoactive substance abuse with intoxication, unspecified                                             |
|  | F19.14  | Other psychoactive substance abuse with psychoactive substance-induced mood disorder                          |
|  | F19.15  | Other psychoactive substance abuse with psychoactive substance-induced psychotic disorder                     |
|  | F19.150 | Other psychoactive substance abuse with psychoactive substance-induced psychotic disorder with delusions      |
|  | F19.151 | Other psychoactive substance abuse with psychoactive substance-induced psychotic disorder with hallucinations |

|  |         |                                                                                                               |
|--|---------|---------------------------------------------------------------------------------------------------------------|
|  | F19.159 | Other psychoactive substance abuse with psychoactive substance-induced psychotic disorder, unspecified        |
|  | F19.16  | Other psychoactive substance abuse with psychoactive substance-induced persisting amnesic disorder            |
|  | F19.17  | Other psychoactive substance abuse with psychoactive substance-induced persisting dementia                    |
|  | F19.18  | Other psychoactive substance abuse with other psychoactive substance-induced disorders                        |
|  | F19.180 | Other psychoactive substance abuse with psychoactive substance-induced anxiety disorder                       |
|  | F19.181 | Other psychoactive substance abuse with psychoactive substance-induced sexual dysfunction                     |
|  | F19.182 | Other psychoactive substance abuse with psychoactive substance-induced sleep disorder                         |
|  | F19.188 | Other psychoactive substance abuse with other psychoactive substance-induced disorder                         |
|  | F19.19  | Other psychoactive substance abuse with unspecified psychoactive substance-induced disorder                   |
|  | F19.2   | Other psychoactive substance dependence                                                                       |
|  | F19.20  | Other psychoactive substance dependence, uncomplicated                                                        |
|  | F19.21  | Other psychoactive substance dependence, in remission                                                         |
|  | F19.22  | Other psychoactive substance dependence with intoxication                                                     |
|  | F19.220 | Other psychoactive substance dependence with intoxication, uncomplicated                                      |
|  | F19.221 | Other psychoactive substance dependence with intoxication delirium                                            |
|  | F19.222 | Other psychoactive substance dependence with intoxication with perceptual disturbance                         |
|  | F19.229 | Other psychoactive substance dependence with intoxication, unspecified                                        |
|  | F19.23  | Other psychoactive substance dependence with withdrawal                                                       |
|  | F19.230 | Other psychoactive substance dependence with withdrawal, uncomplicated                                        |
|  | F19.231 | Other psychoactive substance dependence with withdrawal delirium                                              |
|  | F19.232 | Other psychoactive substance dependence with withdrawal with perceptual disturbance                           |
|  | F19.239 | Other psychoactive substance dependence with withdrawal, unspecified                                          |
|  | F19.24  | Other psychoactive substance dependence with psychoactive substance-induced mood disorder                     |
|  | F19.25  | Other psychoactive substance dependence with psychoactive substance-induced psychotic disorder                |
|  | F19.250 | Other psychoactive substance dependence with psychoactive substance-induced psychotic disorder with delusions |

|  |         |                                                                                                                    |
|--|---------|--------------------------------------------------------------------------------------------------------------------|
|  | F19.251 | Other psychoactive substance dependence with psychoactive substance-induced psychotic disorder with hallucinations |
|  | F19.259 | Other psychoactive substance dependence with psychoactive substance-induced psychotic disorder, unspecified        |
|  | F19.26  | Other psychoactive substance dependence with psychoactive substance-induced persisting amnesic disorder            |
|  | F19.27  | Other psychoactive substance dependence with psychoactive substance-induced persisting dementia                    |
|  | F19.28  | Other psychoactive substance dependence with other psychoactive substance-induced disorders                        |
|  | F19.280 | Other psychoactive substance dependence with psychoactive substance-induced anxiety disorder                       |
|  | F19.281 | Other psychoactive substance dependence with psychoactive substance-induced sexual dysfunction                     |
|  | F19.282 | Other psychoactive substance dependence with psychoactive substance-induced sleep disorder                         |
|  | F19.288 | Other psychoactive substance dependence with other psychoactive substance-induced disorder                         |
|  | F19.29  | Other psychoactive substance dependence with unspecified psychoactive substance-induced disorder                   |

### Mental Disorders

| ICD-9 Codes |                                                                     | ICD-10 Codes |                                           |
|-------------|---------------------------------------------------------------------|--------------|-------------------------------------------|
| 295.0       | Simple type schizophrenia                                           | F20          | Schizophrenia                             |
| 295.00      | Simple type schizophrenia, unspecified                              | F20.0        | Paranoid schizophrenia                    |
| 295.01      | Simple type schizophrenia, subchronic                               | F20.1        | Disorganized schizophrenia                |
| 295.02      | Simple type schizophrenia, chronic                                  | F20.2        | Catatonic schizophrenia                   |
| 295.03      | Simple type schizophrenia, subchronic with acute exacerbation       | F20.3        | Undifferentiated schizophrenia            |
| 295.04      | Simple type schizophrenia, chronic with acute exacerbation          | F20.5        | Residual schizophrenia                    |
| 295.05      | Simple type schizophrenia, in remission                             | F20.8        | Other schizophrenia                       |
| 295.1       | Disorganized type schizophrenia                                     | F20.81       | Schizophreniform disorder                 |
| 295.10      | Disorganized type schizophrenia, unspecified                        | F20.89       | Other schizophrenia                       |
| 295.11      | Disorganized type schizophrenia, subchronic                         | F20.9        | Schizophrenia, unspecified                |
| 295.12      | Disorganized type schizophrenia, chronic                            | F25          | Schizoaffective disorders                 |
| 295.13      | Disorganized type schizophrenia, subchronic with acute exacerbation | F25.0        | Schizoaffective disorder, bipolar type    |
| 295.14      | Disorganized type schizophrenia, chronic with acute exacerbation    | F25.1        | Schizoaffective disorder, depressive type |
| 295.15      | Disorganized type schizophrenia, in remission                       | F25.8        | Other schizoaffective disorders           |

|        |                                                                  |        |                                                                                     |
|--------|------------------------------------------------------------------|--------|-------------------------------------------------------------------------------------|
| 295.2  | Catatonic type schizophrenia                                     | F25.9  | Schizoaffective disorder, unspecified                                               |
| 295.20 | Catatonic type schizophrenia, unspecified                        | F31    | Bipolar disorder                                                                    |
| 295.21 | Catatonic type schizophrenia, subchronic                         | F31.0  | Bipolar disorder, current episode hypomanic                                         |
| 295.22 | Catatonic type schizophrenia, chronic                            | F31.1  | Bipolar disorder, current episode manic without psychotic features                  |
| 295.23 | Catatonic type schizophrenia, subchronic with acute exacerbation | F31.10 | Bipolar disorder, current episode manic without psychotic features, unspecified     |
| 295.24 | Catatonic type schizophrenia, chronic with acute exacerbation    | F31.11 | Bipolar disorder, current episode manic without psychotic features, mild            |
| 295.25 | Catatonic type schizophrenia, in remission                       | F31.12 | Bipolar disorder, current episode manic without psychotic features, moderate        |
| 295.3  | Paranoid type schizophrenia                                      | F31.13 | Bipolar disorder, current episode manic without psychotic features, severe          |
| 295.30 | Paranoid type schizophrenia, unspecified                         | F31.2  | Bipolar disorder, current episode manic severe with psychotic features              |
| 295.31 | Paranoid type schizophrenia, subchronic                          | F31.3  | Bipolar disorder, current episode depressed, mild or moderate severity              |
| 295.32 | Paranoid type schizophrenia, chronic                             | F31.30 | Bipolar disorder, current episode depressed, mild or moderate severity, unspecified |
| 295.33 | Paranoid type schizophrenia, subchronic with acute exacerbation  | F31.31 | Bipolar disorder, current episode depressed, mild                                   |
| 295.34 | Paranoid type schizophrenia, chronic with acute exacerbation     | F31.32 | Bipolar disorder, current episode depressed, moderate                               |
| 295.35 | Paranoid type schizophrenia, in remission                        | F31.4  | Bipolar disorder, current episode depressed, severe, without psychotic features     |
| 295.4  | Schizophreniform disorder                                        | F31.5  | Bipolar disorder, current episode depressed, severe, with psychotic features        |
| 295.40 | Schizophreniform disorder, unspecified                           | F31.6  | Bipolar disorder, current episode mixed                                             |
| 295.41 | Schizophreniform disorder, subchronic                            | F31.60 | Bipolar disorder, current episode mixed, unspecified                                |
| 295.42 | Schizophreniform disorder, chronic                               | F31.61 | Bipolar disorder, current episode mixed, mild                                       |
| 295.43 | Schizophreniform disorder, subchronic with acute exacerbation    | F31.62 | Bipolar disorder, current episode mixed, moderate                                   |
| 295.44 | Schizophreniform disorder, chronic with acute exacerbation       | F31.63 | Bipolar disorder, current episode mixed, severe, without psychotic features         |
| 295.45 | Schizophreniform disorder, in remission                          | F31.64 | Bipolar disorder, current episode mixed, severe, with psychotic features            |
| 295.5  | Latent schizophrenia                                             | F31.7  | Bipolar disorder, currently in remission                                            |
| 295.50 | Latent schizophrenia, unspecified                                | F31.70 | Bipolar disorder, currently in remission, most recent episode unspecified           |
| 295.51 | Latent schizophrenia, subchronic                                 | F31.71 | Bipolar disorder, in partial remission, most recent episode hypomanic               |
| 295.52 | Latent schizophrenia, chronic                                    | F31.72 | Bipolar disorder, in full remission, most recent episode hypomanic                  |
| 295.53 | Latent schizophrenia, subchronic with acute exacerbation         | F31.73 | Bipolar disorder, in partial remission, most recent episode manic                   |
| 295.54 | Latent schizophrenia, chronic with acute exacerbation            | F31.74 | Bipolar disorder, in full remission, most recent episode manic                      |
| 295.55 | Latent schizophrenia, in remission                               | F31.75 | Bipolar disorder, in partial remission, most recent episode depressed               |
| 295.6  | Schizophrenic disorder, residual type                            | F31.76 | Bipolar disorder, in full remission, most recent episode depressed                  |

|        |                                                                            |        |                                                                              |
|--------|----------------------------------------------------------------------------|--------|------------------------------------------------------------------------------|
| 295.60 | Schizophrenic disorders, residual type, unspecified                        | F31.77 | Bipolar disorder, in partial remission, most recent episode mixed            |
| 295.61 | Schizophrenic disorders, residual type, subchronic                         | F31.78 | Bipolar disorder, in full remission, most recent episode mixed               |
| 295.62 | Schizophrenic disorders, residual type, chronic                            | F31.8  | Other bipolar disorders                                                      |
| 295.63 | Schizophrenic disorders, residual type, subchronic with acute exacerbation | F31.81 | Bipolar II disorder                                                          |
| 295.64 | Schizophrenic disorders, residual type, chronic with acute exacerbation    | F31.89 | Other bipolar disorder                                                       |
| 295.65 | Schizophrenic disorders, residual type, in remission                       | F31.9  | Bipolar disorder, unspecified                                                |
| 295.8  | Other specified types of schizophrenia                                     | F30.10 | Manic episode without psychotic symptoms, unspecified                        |
| 295.80 | Other specified types of schizophrenia, unspecified                        | F30.11 | Manic episode without psychotic symptoms, mild                               |
| 295.81 | Other specified types of schizophrenia, subchronic                         | F30.12 | Manic episode without psychotic symptoms, moderate                           |
| 295.82 | Other specified types of schizophrenia, chronic                            | F30.13 | Manic episode, severe, without psychotic symptoms                            |
| 295.83 | Other specified types of schizophrenia, subchronic with acute exacerbation | F30.2  | Manic episode, severe with psychotic symptoms                                |
| 295.84 | Other specified types of schizophrenia, chronic with acute exacerbation    | F30.3  | Manic episode in partial remission                                           |
| 295.85 | Other specified types of schizophrenia, in remission                       | F30.4  | Manic episode in full remission                                              |
| 295.9  | Unspecified schizophrenia                                                  | F30.8  | Other manic episodes                                                         |
| 295.90 | Unspecified schizophrenia, unspecified                                     | F32.89 | Other specified depressive episodes                                          |
| 295.91 | Unspecified schizophrenia, subchronic                                      | F39    | Unspecified mood [affective] disorder                                        |
| 295.92 | Unspecified schizophrenia, chronic                                         | F34.81 | Disruptive mood dysregulation disorder                                       |
| 295.93 | Unspecified schizophrenia, subchronic with acute exacerbation              | F34.89 | Other specified persistent mood disorders                                    |
| 295.94 | Unspecified schizophrenia, chronic with acute exacerbation                 | F32.9  | Major depressive disorder, single episode, unspecified                       |
| 295.95 | Unspecified schizophrenia, in remission                                    | F32.0  | Major depressive disorder, single episode, mild                              |
| V11.0  | Schizoaffective disorder                                                   | F32.1  | Major depressive disorder, single episode, moderate                          |
| 295.7  | Schizoaffective disorder                                                   | F32.2  | Major depressive disorder, single episode, severe without psychotic features |
| 295.70 | Schizoaffective disorder, unspecified                                      | F32.3  | Major depressive disorder, single episode, severe with psychotic features    |
| 295.71 | Schizoaffective disorder, subchronic                                       | F32.4  | Major depressive disorder, single episode, in partial remission              |
| 295.72 | Schizoaffective disorder, chronic                                          | F32.5  | Major depressive disorder, single episode, in full remission                 |
| 295.73 | Schizoaffective disorder, subchronic with acute exacerbation               | F33.0  | Major depressive disorder, recurrent, mild                                   |
| 295.74 | Schizoaffective disorder, chronic with acute exacerbation                  | F33.1  | Major depressive disorder, recurrent, moderate                               |
| 295.75 | Schizoaffective disorder, in remission                                     | F33.2  | Major depressive disorder, recurrent severe without psychotic features       |
| 296.0  | Bipolar I disorder, single manic episode                                   | F33.3  | Major depressive disorder, recurrent, severe with psychotic symptoms         |

|        |                                                                                                               |        |                                                                 |
|--------|---------------------------------------------------------------------------------------------------------------|--------|-----------------------------------------------------------------|
| 296.00 | Bipolar I disorder, single manic episode, unspecified                                                         | F33.4  | Major depressive disorder, recurrent, in remission              |
| 296.01 | Bipolar I disorder, single manic episode, mild                                                                | F33.40 | Major depressive disorder, recurrent, in remission, unspecified |
| 296.02 | Bipolar I disorder, single manic episode, moderate                                                            | F33.41 | Major depressive disorder, recurrent, in partial remission      |
| 296.03 | Bipolar I disorder, single manic episode, severe, without mention of psychotic behavior                       | F33.42 | Major depressive disorder, recurrent, in full remission         |
| 296.04 | Bipolar I disorder, single manic episode, severe, specified as with psychotic behavior                        | F33.9  | Major depressive disorder, recurrent, unspecified               |
| 296.05 | Bipolar I disorder, single manic episode, in partial or unspecified remission                                 | F41    | Other anxiety disorders                                         |
| 296.06 | Bipolar I disorder, single manic episode, in full remission                                                   | F41.0  | Panic disorder [episodic paroxysmal anxiety]                    |
| 296.1  | Manic disorder recurrent episode                                                                              | F41.1  | Generalized anxiety disorder                                    |
| 296.10 | Manic affective disorder, recurrent episode, unspecified                                                      | F41.3  | Other mixed anxiety disorders                                   |
| 296.11 | Manic affective disorder, recurrent episode, mild                                                             | F41.8  | Other specified anxiety disorders                               |
| 296.12 | Manic affective disorder, recurrent episode, moderate                                                         | F41.9  | Anxiety disorder, unspecified                                   |
| 296.13 | Manic affective disorder, recurrent episode, severe, without mention of psychotic behavior                    | F43.1  | Post-traumatic stress disorder (PTSD)                           |
| 296.14 | Manic affective disorder, recurrent episode, severe, specified as with psychotic behavior                     | F43.10 | Post-traumatic stress disorder, unspecified                     |
| 296.15 | Manic affective disorder, recurrent episode, in partial or unspecified remission                              | F43.11 | Post-traumatic stress disorder, acute                           |
| 296.16 | Manic affective disorder, recurrent episode, in full remission                                                | F43.12 | Post-traumatic stress disorder, chronic                         |
| 296.4  | Bipolar I disorder, most recent episode (or current) manic                                                    |        |                                                                 |
| 296.40 | Bipolar I disorder, most recent episode (or current) manic, unspecified                                       |        |                                                                 |
| 296.41 | Bipolar I disorder, most recent episode (or current) manic, mild                                              |        |                                                                 |
| 296.42 | Bipolar I disorder, most recent episode (or current) manic, moderate                                          |        |                                                                 |
| 296.43 | Bipolar I disorder, most recent episode (or current) manic, severe, without mention of psychotic behavior     |        |                                                                 |
| 296.44 | Bipolar I disorder, most recent episode (or current) manic, severe, specified as with psychotic behavior      |        |                                                                 |
| 296.45 | Bipolar I disorder, most recent episode (or current) manic, in partial or unspecified remission               |        |                                                                 |
| 296.46 | Bipolar I disorder, most recent episode (or current) manic, in full remission                                 |        |                                                                 |
| 296.5  | Bipolar I disorder, most recent episode (or current) depressed                                                |        |                                                                 |
| 296.50 | Bipolar I disorder, most recent episode (or current) depressed, unspecified                                   |        |                                                                 |
| 296.51 | Bipolar I disorder, most recent episode (or current) depressed, mild                                          |        |                                                                 |
| 296.52 | Bipolar I disorder, most recent episode (or current) depressed, moderate                                      |        |                                                                 |
| 296.53 | Bipolar I disorder, most recent episode (or current) depressed, severe, without mention of psychotic behavior |        |                                                                 |
| 296.54 | Bipolar I disorder, most recent episode (or current) depressed, severe, specified as with psychotic behavior  |        |                                                                 |

|        |                                                                                                           |
|--------|-----------------------------------------------------------------------------------------------------------|
| 296.55 | Bipolar I disorder, most recent episode (or current) depressed, in partial or unspecified remission       |
| 296.56 | Bipolar I disorder, most recent episode (or current) depressed, in full remission                         |
| 296.6  | Bipolar I disorder, most recent episode (or current) mixed                                                |
| 296.60 | Bipolar I disorder, most recent episode (or current) mixed, unspecified                                   |
| 296.61 | Bipolar I disorder, most recent episode (or current) mixed, mild                                          |
| 296.62 | Bipolar I disorder, most recent episode (or current) mixed, moderate                                      |
| 296.63 | Bipolar I disorder, most recent episode (or current) mixed, severe, without mention of psychotic behavior |
| 296.64 | Bipolar I disorder, most recent episode (or current) mixed, severe, specified as with psychotic behavior  |
| 296.65 | Bipolar I disorder, most recent episode (or current) mixed, in partial or unspecified remission           |
| 296.66 | Bipolar I disorder, most recent episode (or current) mixed, in full remission                             |
| 296.7  | Bipolar I disorder, most recent episode (or current) unspecified                                          |
| 296.8  | Other and unspecified bipolar disorders                                                                   |
| 296.80 | Bipolar disorder, unspecified                                                                             |
| 296.81 | Atypical manic disorder                                                                                   |
| 296.82 | Atypical depressive disorder                                                                              |
| 296.89 | Other bipolar disorders                                                                                   |
| 296.9  | Other and unspecified episodic mood disorder                                                              |
| 296.90 | Unspecified episodic mood disorder                                                                        |
| 296.99 | Other specified episodic mood disorder                                                                    |
| V11.1  | Personal history of affective disorders                                                                   |
| 296.20 | Major depressive affective disorder, single episode, unspecified                                          |
| 296.21 | Major depressive affective disorder, single episode, mild                                                 |
| 296.22 | Major depressive affective disorder, single episode, moderate                                             |
| 296.23 | Major depressive affective disorder, single episode, severe, without mention of psychotic behavior        |
| 296.24 | Major depressive affective disorder, single episode, severe, specified as with psychotic behavior         |
| 296.25 | Major depressive affective disorder, single episode, in partial or unspecified remission                  |
| 296.26 | Major depressive affective disorder, single episode, in full remission                                    |
| 296.3  | Major depressive disorder recurrent episode                                                               |
| 296.30 | Major depressive affective disorder, recurrent episode, unspecified                                       |

|        |                                                                                                       |
|--------|-------------------------------------------------------------------------------------------------------|
| 296.31 | Major depressive affective disorder, recurrent episode, mild                                          |
| 296.32 | Major depressive affective disorder, recurrent episode, moderate                                      |
| 296.33 | Major depressive affective disorder, recurrent episode, severe, without mention of psychotic behavior |
| 296.34 | Major depressive affective disorder, recurrent episode, severe, specified as with psychotic behavior  |
| 296.35 | Major depressive affective disorder, recurrent episode, in partial or unspecified remission           |
| 296.36 | Major depressive affective disorder, recurrent episode, in full remission                             |
| 300.00 | Anxiety state, unspecified                                                                            |
| 300.01 | Panic disorder without agoraphobia                                                                    |
| 300.02 | Generalized anxiety disorder                                                                          |
| 300.09 | Other anxiety states                                                                                  |
| 799.2  | Nervousness                                                                                           |
| 309.81 | Posttraumatic stress disorder                                                                         |

Note: If the codes were given in the outpatient setting, two codes were required for a diagnosis. If the codes were given in the inpatient setting, only one code was required for a diagnosis.



Figure S3A. Percentage of men with an AUD diagnosis by maximum heavy episodic drinking frequency, stratified by race and ethnicity (n=638,165).

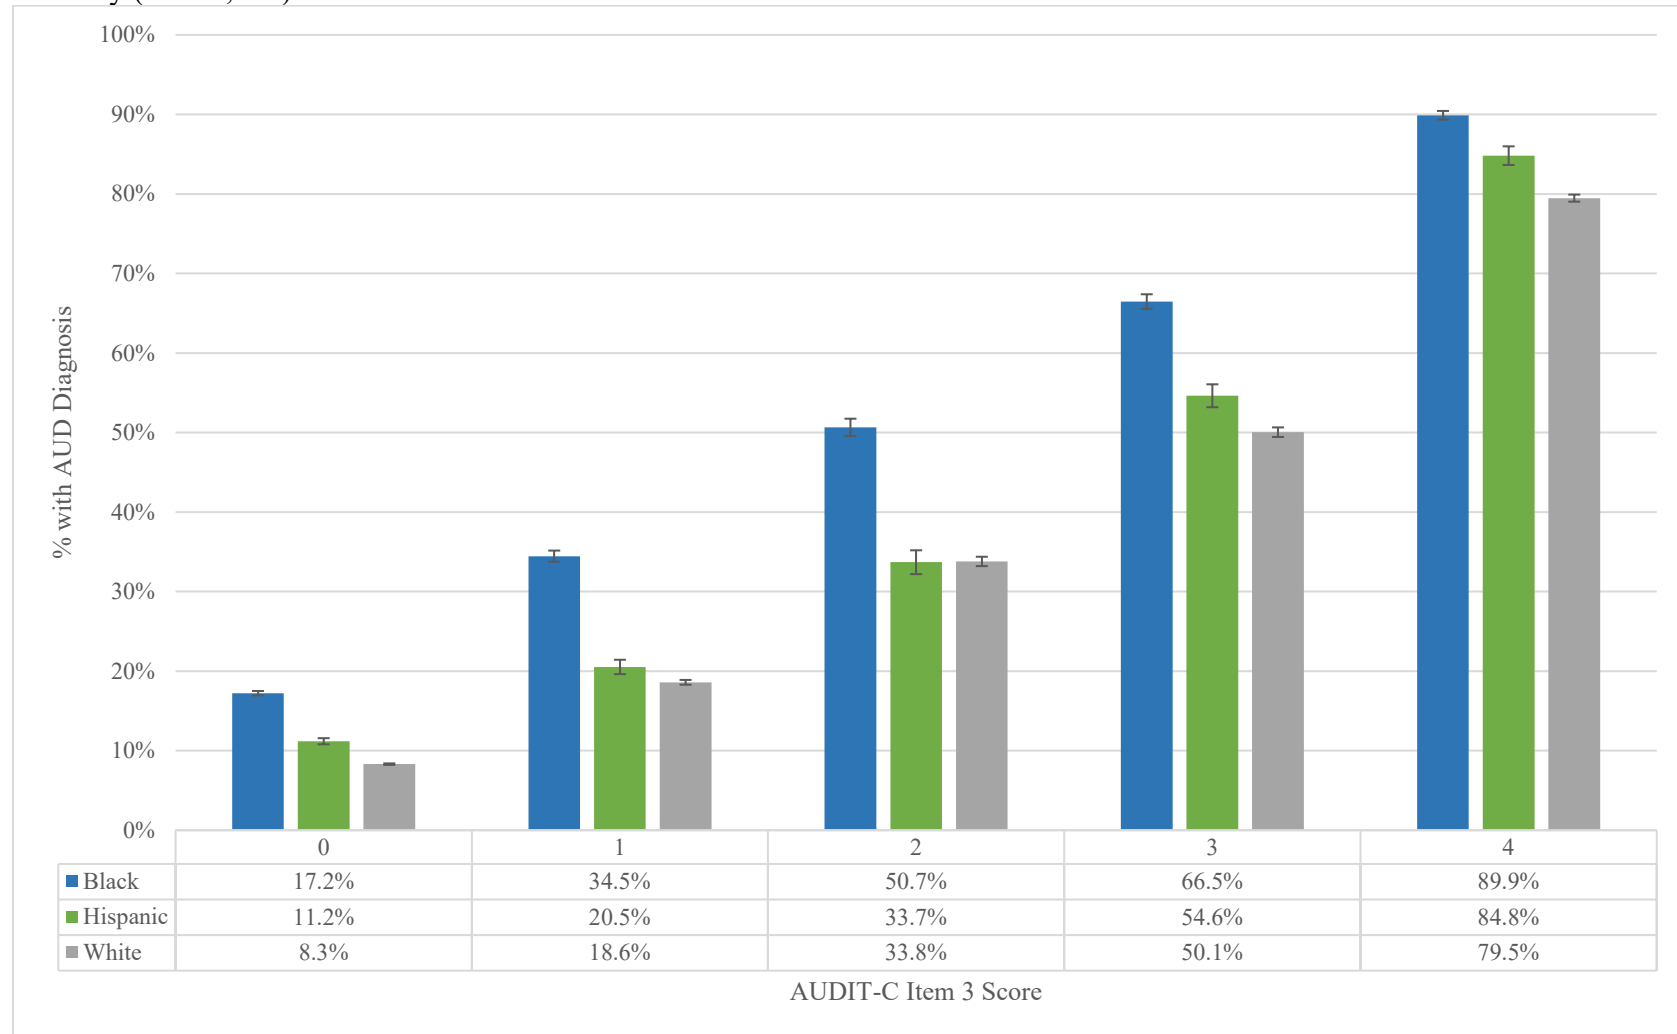

AUD=alcohol use disorder; AUDIT-C=Alcohol Use Disorders Identification Test – Consumption.

Note: Heavy episodic drinking frequency is measured by the 3<sup>rd</sup> item of the AUDIT-C where 0=never, 1=less than monthly, 2=monthly, 3=weekly, and 4=daily or almost daily.

Figure S3B. Percentage of women with an AUD diagnosis by maximum heavy episodic drinking frequency, stratified by race and ethnicity (n=61,805).

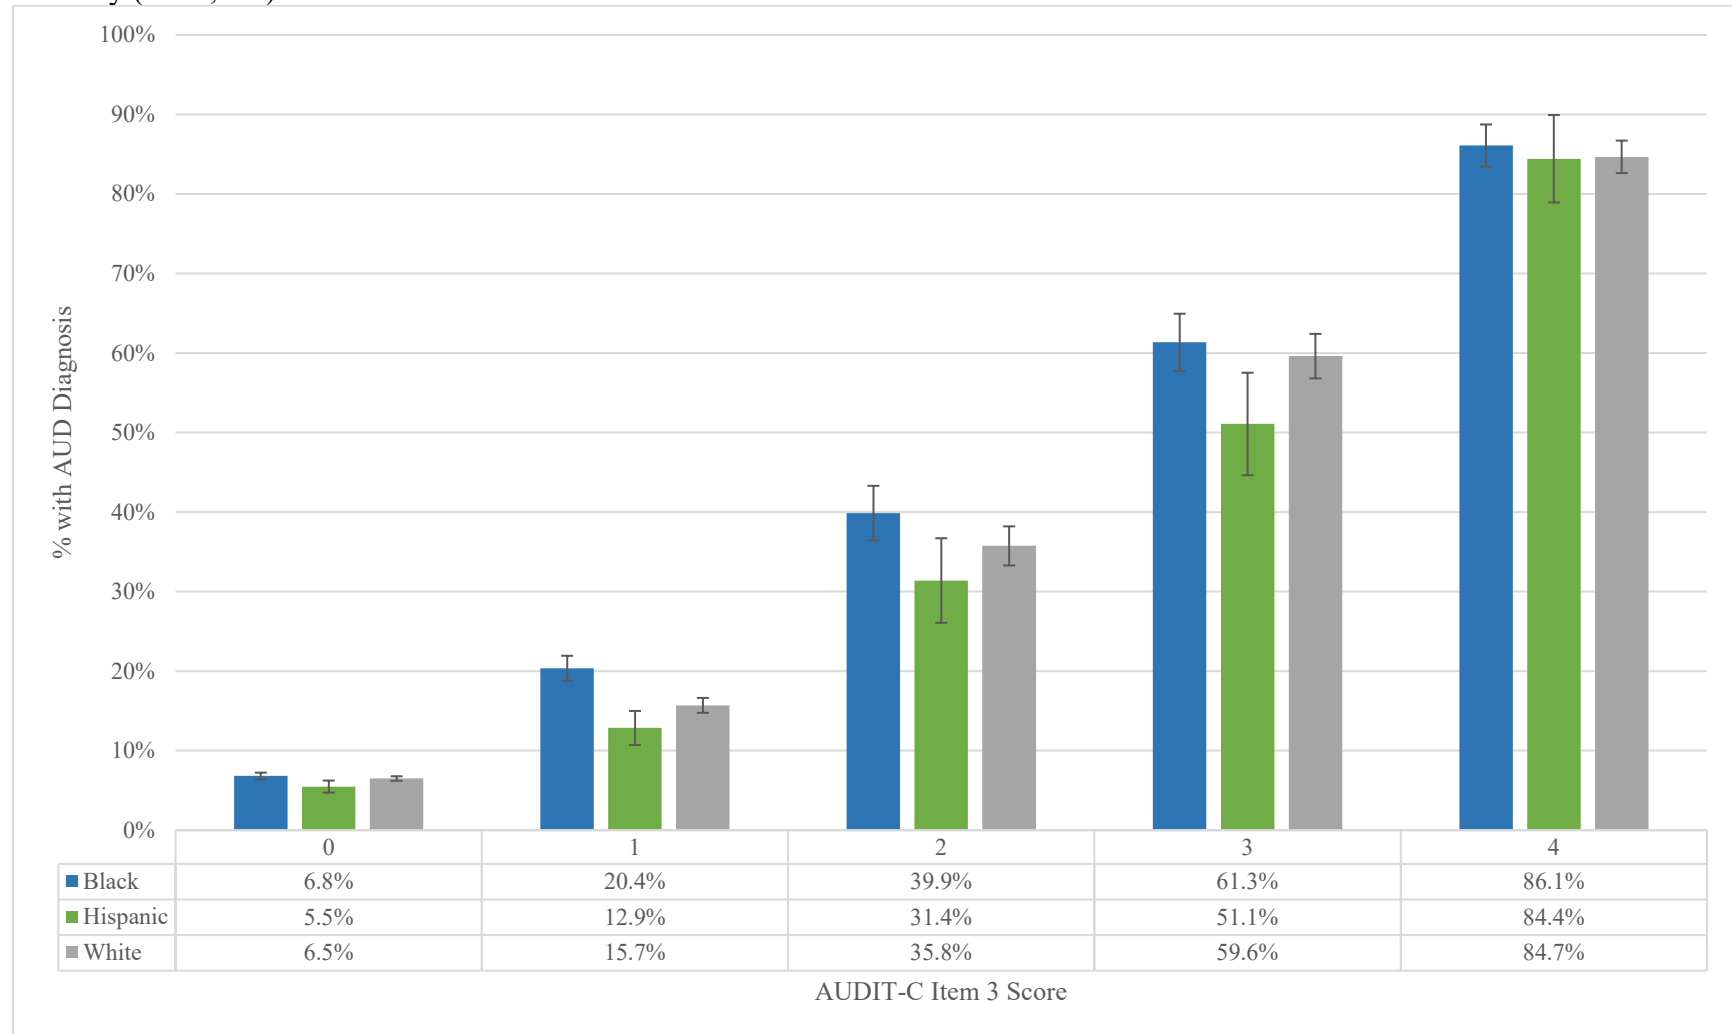

AUD=alcohol use disorder; AUDIT-C=Alcohol Use Disorders Identification Test – Consumption.

Note: Heavy episodic drinking frequency is measured by the 3<sup>rd</sup> item of the AUDIT-C where 0=never, 1=less than monthly, 2=monthly, 3=weekly, and 4=daily or almost daily.

Table S3. Adjusted association between sex and AUD diagnosis, stratified by race and ethnicity.

| <i>Variables</i>                         | Black (n=137,054)*   |          | Hispanic (n=50,413)* |          | White (n=512,485)*   |          |
|------------------------------------------|----------------------|----------|----------------------|----------|----------------------|----------|
|                                          | aOR (95% CI)         | <i>P</i> | aOR (95% CI)         | <i>P</i> | aOR (95% CI)         | <i>P</i> |
| Highest AUDIT-C score                    | 1.47 (1.46, 1.48)    | <0.001   | 1.46 (1.45, 1.48)    | <0.001   | 1.48 (1.47, 1.48)    | <0.001   |
| Women (ref=men)                          | 0.57 (0.54, 0.61)    | <0.001   | 0.70 (0.62, 0.78)    | <0.001   | 0.68 (0.65, 0.71)    | <0.001   |
| Age (10-yr increments)                   | 1.13 (1.12, 1.15)    | <0.001   | 1.12 (1.10, 1.14)    | <0.001   | 1.03 (1.02, 1.04)    | <0.001   |
| <i>Alcohol-Related Characteristics</i>   |                      |          |                      |          |                      |          |
| Cirrhosis**                              | 14.20 (11.64, 17.31) | <0.001   | 22.73 (18.01, 28.69) | <0.001   | 18.31 (16.78, 19.98) | <0.001   |
| Neuropathy**                             | 16.37 (8.93, 30.01)  | <0.001   | 8.27 (2.01, 34.04)   | 0.003    | 15.69 (12.35, 19.93) | <0.001   |
| Cardiomyopathy**                         | 20.13 (13.01, 31.16) | <0.001   | 26.41 (9.88, 70.64)  | <0.001   | 15.77 (12.15, 20.48) | <0.001   |
| Gastritis**                              | 35.87 (14.93, 86.13) | <0.001   | 10.38 (2.59, 41.72)  | 0.001    | 36.98 (21.49, 63.70) | <0.001   |
| Fatty liver disease**                    | 3.93 (2.95, 5.23)    | <0.001   | 3.79 (2.67, 5.39)    | <0.001   | 5.01 (4.38, 5.74)    | <0.001   |
| Hepatitis**                              | 14.07 (8.99, 22.02)  | <0.001   | 20.95 (9.61, 45.68)  | <0.001   | 16.55 (12.42, 22.05) | <0.001   |
| Liver damage**                           | 8.94 (5.80, 13.79)   | <0.001   | 5.20 (2.90, 9.31)    | <0.001   | 9.95 (7.74, 12.79)   | <0.001   |
| <i>Other Clinical ICD-9/10 Diagnoses</i> |                      |          |                      |          |                      |          |
| Drug abuse/dependence                    | 16.73 (16.13, 17.35) | <0.001   | 12.80 (11.93, 13.72) | <0.001   | 11.19 (10.91, 11.48) | <0.001   |
| Mental disorder                          | 2.68 (2.58, 2.78)    | <0.001   | 3.19 (2.98, 3.42)    | <0.001   | 3.47 (3.39, 3.54)    | <0.001   |
| C-statistic                              | 0.92                 |          | 0.90                 |          | 0.89                 |          |

aOR=adjusted odds ratio; 95% CI =95% confidence interval; AUDIT-C=Alcohol Use Disorders Identification Test – Consumption; AUD=alcohol use disorder. \*Number of observations with missing age: Black men (n=5); Black women (n=1); Hispanic men (n=8); Hispanic women (n=1); White men (n=42); White women (n=3). \*\*Alcohol-specific diagnosis.

Figure S4. Predicted probabilities of AUD diagnosis among women, by race and ethnicity (n=61,803).

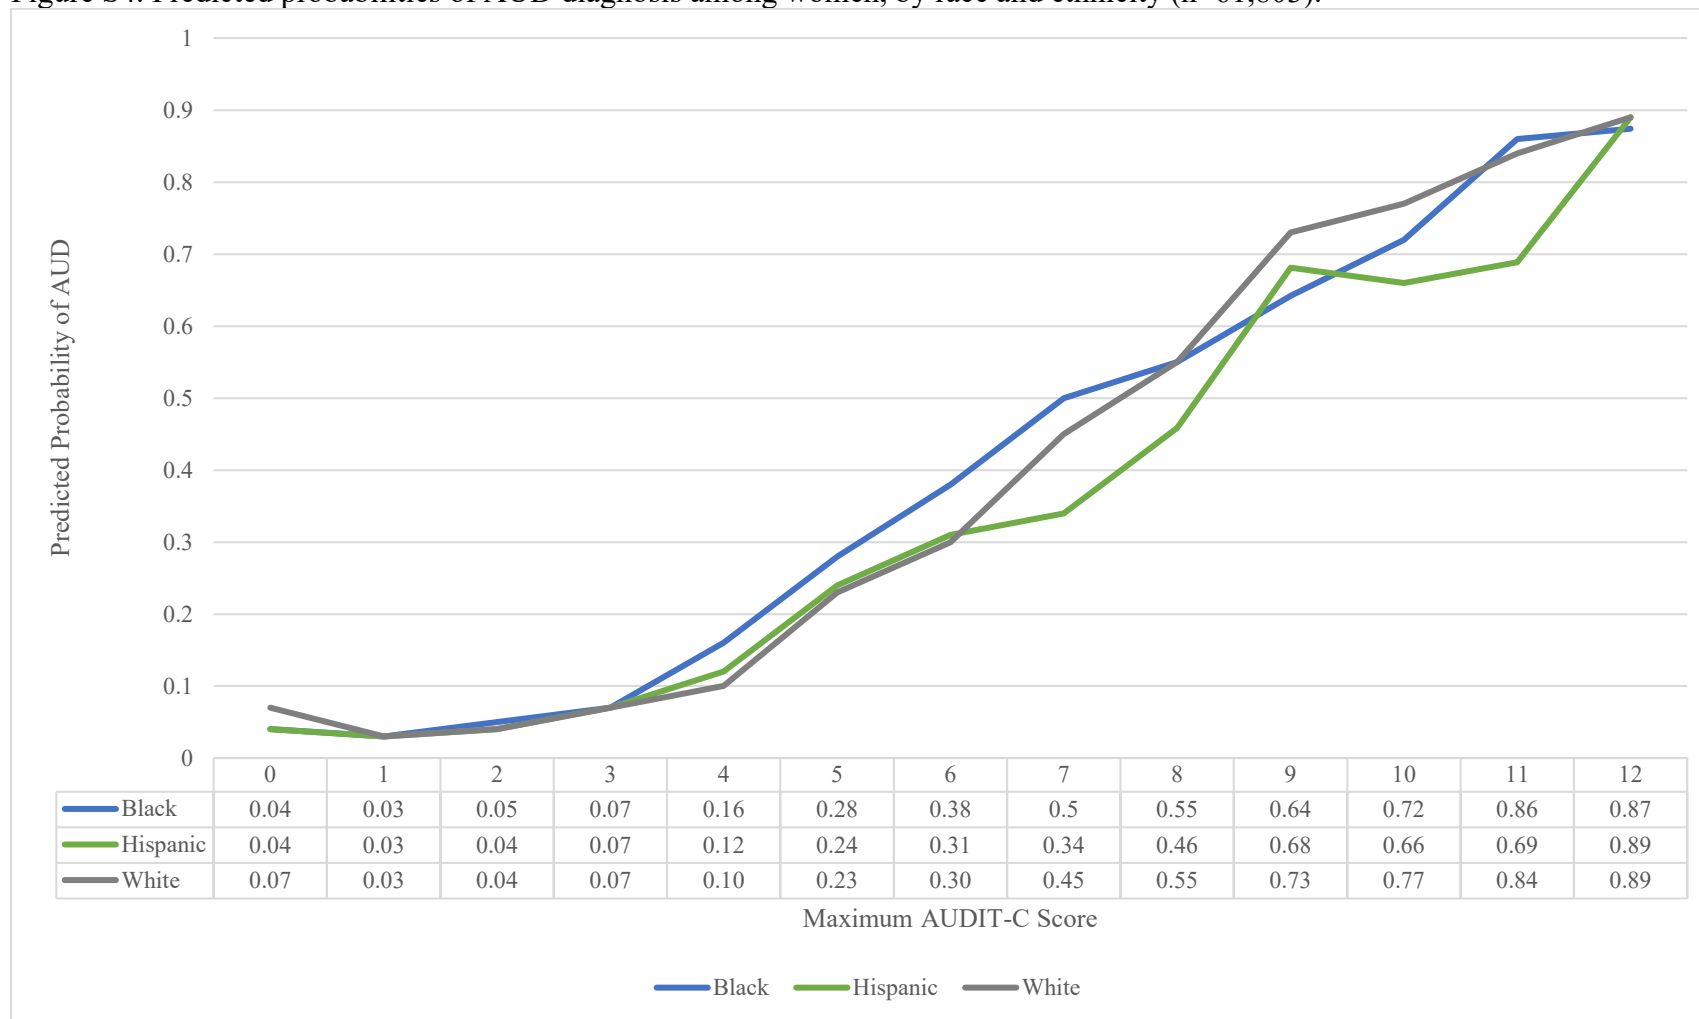

AUD=alcohol use disorder; AUDIT-C= Alcohol Use Disorders Identification Test – Consumption.

Note: These estimates come from the multivariable logistic regression model of factors associated with AUD diagnosis (Table 2). Age was set at 51 years (mean age for women), mental disorder=1, all other covariates=0. The connecting lines are for visualization purposes only since the interaction was accounted for by a composite variable of race/ethnicity and maximum AUDIT-C score, and should not be interpreted as continuous.

Table S4. Sensitivity analysis of factors associated with AUD diagnosis using age-adjusted mean AUDIT-C score as the measure of alcohol consumption, overall and stratified by sex.

| <i>Variables</i>                                       | Overall (n=699,952)* |          | Men (n=638,149)*     |          | Women (n=61,803)*       |          |
|--------------------------------------------------------|----------------------|----------|----------------------|----------|-------------------------|----------|
|                                                        | aOR (95% CI)         | <i>P</i> | aOR (95% CI)         | <i>P</i> | aOR (95% CI)            | <i>P</i> |
| Race and ethnicity x age-adjusted mean AUDIT-C score** |                      |          |                      |          |                         |          |
| Black (ref=White)                                      | 2.13 (2.03, 2.24)    | <0.001   | 2.13 (2.03, 2.25)    | <0.001   | 1.66 (1.44, 1.90)       | <0.001   |
| Hispanic (ref=White)                                   | 1.22 (1.14, 1.32)    | <0.001   | 1.21 (1.12, 1.30)    | <0.001   | 1.28 (1.03, 1.60)       | 0.028    |
| Women (ref=men)                                        | 0.59 (0.57, 0.61)    | <0.001   | -                    | -        | -                       | -        |
| Age (10-yr increments)                                 | 1.01 (1.01, 1.02)    | <0.001   | 1.01 (1.00, 1.02)    | 0.002    | 1.04 (1.01, 1.06)       | 0.004    |
| <i>Alcohol-Related Characteristics</i>                 |                      |          |                      |          |                         |          |
| Cirrhosis***                                           | 21.13 (19.67, 22.71) | <0.001   | 20.81 (18.36, 22.38) | <0.001   | 27.50 (16.70, 45.28)    | <0.001   |
| Neuropathy***                                          | 21.17 (17.16, 26.12) | <0.001   | 20.15 (16.32, 24.88) | <0.001   | 314.45 (35.15, >999.99) | <0.001   |
| Cardiomyopathy***                                      | 21.83 (17.70, 26.93) | <0.001   | 21.49 (17.41, 26.53) | <0.001   | 41.43 (6.14, 279.36)    | <0.001   |
| Gastritis***                                           | 45.49 (29.94, 69.13) | <0.001   | 46.82 (30.38, 72.15) | <0.001   | 22.61 (4.50, 113.63)    | <0.001   |
| Fatty liver disease***                                 | 5.63 (5.03, 6.29)    | <0.001   | 5.65 (5.05, 6.33)    | <0.001   | 5.33 (2.97, 9.56)       | <0.001   |
| Hepatitis***                                           | 21.61 (17.31, 26.98) | <0.001   | 22.65 (18.02, 28.45) | <0.001   | 6.68 (2.65, 16.82)      | <0.001   |
| Liver damage***                                        | 10.54 (8.60, 12.90)  | <0.001   | 10.12 (8.24, 12.44)  | <0.001   | 28.51 (9.43, 86.21)     | <0.001   |
| <i>Other Clinical ICD-9/10 Diagnoses</i>               |                      |          |                      |          |                         |          |
| Drug abuse/dependence                                  | 14.72 (14.45, 15.00) | <0.001   | 14.55 (14.26, 14.84) | <0.001   | 15.75 (14.75, 16.82)    | <0.001   |
| Mental disorder                                        | 3.98 (3.91, 4.05)    | <0.001   | 3.89 (3.82, 3.97)    | <0.001   | 6.97 (6.23, 7.81)       | <0.001   |
| C-statistic                                            | 0.88                 |          | 0.88                 |          | 0.88                    |          |

aOR=adjusted odds ratio; 95% CI =95% confidence interval; AUDIT-C=Alcohol Use Disorders Identification Test – Consumption; AUD=alcohol use disorder. \* Number of observations with missing age: Black men (n=5); Hispanic men (n=8); White men (n=42); Black women (n=1); Hispanic women (n=1); White women (n=3). \*\* Odds ratios displayed at age-adjusted mean AUDIT-C scores equal to those in the primary analysis (mean=3, 3, 2 for overall, men, and women, respectively). \*\*\* Alcohol-specific diagnosis.

Table S5. Sensitivity analysis of individuals with a maximum AUDIT-C greater than zero, overall and stratified by sex.

| <i>Variables</i>                             | Overall (n=552,437)* |                      | Men (n=501,685)*     |                      | Women (n=50,752)*       |                      |
|----------------------------------------------|----------------------|----------------------|----------------------|----------------------|-------------------------|----------------------|
|                                              | aOR (95% CI)         | <i>P</i>             | aOR (95% CI)         | <i>P</i>             | aOR (95% CI)            | <i>P</i>             |
| Race and ethnicity x highest AUDIT-C score** |                      | <0.0001 <sup>a</sup> |                      | <0.0001 <sup>a</sup> |                         | <0.0001 <sup>a</sup> |
| Black (ref=White)                            | 2.16 (2.05, 2.27)    | <0.0001              | 2.20 (2.08, 2.32)    | <0.0001              | 1.12 (0.93, 1.36)       | 0.2431               |
| Hispanic (ref=White)                         | 1.31 (1.20, 1.42)    | <0.0001              | 1.30 (1.19, 1.43)    | <0.0001              | 1.10 (0.81, 1.50)       | 0.5392               |
| Women (ref=men)                              | 0.71 (0.68, 0.73)    | <0.0001              | -                    | -                    | -                       | -                    |
| Age (10-yr increments)                       | 1.07 (1.06, 1.07)    | <0.0001              | 1.07 (1.06, 1.07)    | <0.0001              | 1.09 (1.06, 1.12)       | <0.0001              |
| <i>Alcohol-Related Characteristics</i>       |                      |                      |                      |                      |                         |                      |
| Cirrhosis***                                 | 16.69 (15.24, 18.29) | <0.0001              | 16.52 (15.07, 18.11) | <0.0001              | 19.84 (10.78, 36.52)    | <0.0001              |
| Neuropathy***                                | 14.03 (10.94, 18.01) | <0.0001              | 13.58 (10.57, 17.44) | <0.0001              | 129.52 (11.58, >999.99) | <0.0001              |
| Cardiomyopathy***                            | 16.84 (13.16, 21.55) | <0.0001              | 16.60 (12.96, 21.26) | <0.0001              | 42.85 (2.96, 620.74)    | 0.0059               |
| Gastritis***                                 | 25.50 (15.93, 40.81) | <0.0001              | 25.41 (15.71, 41.09) | <0.0001              | 20.87 (2.28, 191.41)    | 0.0072               |
| Fatty liver disease***                       | 4.83 (4.27, 5.48)    | <0.0001              | 4.79 (4.22, 5.44)    | <0.0001              | 6.41 (3.36, 12.21)      | <0.0001              |
| Hepatitis***                                 | 13.63 (10.54, 17.62) | <0.0001              | 14.34 (10.99, 18.70) | <0.0001              | 4.45 (1.64, 12.07)      | 0.0033               |
| Liver damage***                              | 7.83 (6.23, 9.85)    | <0.0001              | 7.52 (5.95, 9.50)    | <0.0001              | 18.36 (5.84, 57.74)     | <0.0001              |
| <i>Other Clinical ICD-9/10 Diagnoses</i>     |                      |                      |                      |                      |                         |                      |
| Drug abuse/dependence                        | 12.40 (12.12, 12.68) | <0.0001              | 12.27 (11.99, 12.57) | <0.0001              | 12.79 (11.84, 13.81)    | <0.0001              |
| Mental disorder                              | 3.05 (2.99, 3.11)    | <0.0001              | 3.00 (2.94, 3.06)    | <0.0001              | 4.66 (4.13, 5.26)       | <0.0001              |
| C-statistic                                  | 0.91                 |                      | 0.91                 |                      | 0.91                    |                      |

aOR=adjusted odds ratio; 95% CI=95% confidence interval; AUDIT-C=Alcohol Use Disorders Identification Test – Consumption; AUD=alcohol use disorder. \*Number of observations with missing age: Black men (n=3); Hispanic men (n=7); White men (n=25); Black women (n=0); Hispanic women (n=1); White women (n=3). \*\*Odds ratios displayed at mean highest AUDIT-C score (mean=4, 4, 3 for overall, men, and women, respectively). \*\*\*Alcohol-specific diagnosis. <sup>a</sup>*P*-value for overall interaction.

Table S6. Sensitivity analysis of restricted AUD diagnosis date, overall and stratified by sex.

| <i>Variables</i>                             | Overall (n=637,969)* |                      | Men (n=578,955)*     |                      | Women (n=59,014)*       |                      |
|----------------------------------------------|----------------------|----------------------|----------------------|----------------------|-------------------------|----------------------|
|                                              | aOR (95% CI)         | <i>P</i>             | aOR (95% CI)         | <i>P</i>             | aOR (95% CI)            | <i>P</i>             |
| Race and ethnicity x highest AUDIT-C score** |                      | <0.0001 <sup>a</sup> |                      | <0.0001 <sup>a</sup> |                         | <0.0001 <sup>a</sup> |
| Black (ref=White)                            | 1.75 (1.63, 1.87)    | <0.0001              | 1.85 (1.72, 1.99)    | <0.0001              | 1.18 (0.95, 1.46)       | 0.1285               |
| Hispanic (ref=White)                         | 1.33 (1.19, 1.48)    | <0.0001              | 1.34 (1.19, 1.51)    | <0.0001              | 1.14 (0.81, 1.61)       | 0.4554               |
| Women (ref=men)                              | 0.75 (0.72, 0.78)    | <0.0001              | -                    | -                    | -                       | -                    |
| Age (10-yr increments)                       | 0.94 (0.93, 0.95)    | <0.0001              | 0.94 (0.93, 0.95)    | <0.0001              | 0.94 (0.91, 0.97)       | <0.0001              |
| <i>Alcohol-Related Characteristics</i>       |                      |                      |                      |                      |                         |                      |
| Cirrhosis***                                 | 17.13 (15.76, 18.61) | <0.0001              | 16.94 (15.58, 18.41) | <0.0001              | 18.05 (10.05, 32.40)    | <0.0001              |
| Neuropathy**                                 | 11.43 (8.89, 14.70)  | <0.0001              | 10.96 (8.52, 14.11)  | <0.0001              | 211.66 (17.68, >999.99) | <0.0001              |
| Cardiomyopathy***                            | 13.59 (10.61, 17.41) | <0.0001              | 13.35 (10.41, 17.12) | <0.0001              | 34.40 (4.28, 276.56)    | 0.0009               |
| Gastritis***                                 | 16.01 (9.82, 26.13)  | <0.0001              | 16.04 (9.69, 26.54)  | <0.0001              | 17.19 (2.13, 138.54)    | 0.0076               |
| Fatty liver disease***                       | 4.00 (3.50, 4.57)    | <0.0001              | 3.97 (3.47, 4.55)    | <0.0001              | 4.83 (2.44, 9.57)       | <0.0001              |
| Hepatitis***                                 | 10.05 (7.78, 12.97)  | <0.0001              | 10.54 (8.10, 13.72)  | <0.0001              | 4.07 (1.46, 11.36)      | 0.0074               |
| Liver damage***                              | 4.69 (3.70, 5.94)    | <0.0001              | 4.37 (3.44, 5.57)    | <0.0001              | 20.39 (6.12, 67.91)     | <0.0001              |
| <i>Other Clinical ICD-9/10 Diagnoses</i>     |                      |                      |                      |                      |                         |                      |
| Drug abuse/dependence                        | 8.37 (8.17, 8.58)    | <0.0001              | 8.22 (8.02, 8.44)    | <0.0001              | 9.58 (8.82, 10.41)      | <0.0001              |
| Mental disorder                              | 2.89 (2.83, 2.95)    | <0.0001              | 2.84 (2.78, 2.91)    | <0.0001              | 4.21 (3.70, 4.78)       | <0.0001              |
| C-statistic                                  | 0.90                 |                      | 0.90                 |                      | 0.91                    |                      |

aOR=adjusted odds ratio; 95% CI=95% confidence interval; AUDIT-C=Alcohol Use Disorders Identification Test – Consumption; AUD=alcohol use disorder. \*Number of observations with missing age: Black men (n=5); Hispanic men (n=8); White men (n=42); Black women (n=1); Hispanic women (n=1); White women (n=3). \*\*Odds ratios displayed at mean highest AUDIT-C score (mean=3, 3, 2 for overall, men, and women, respectively). \*\*\*Alcohol-specific diagnosis. <sup>a</sup>*P*-value for overall interaction.
